# Supplementary material
Source: PubMed Central journal article supplement (PMC6085089)
Supplement: NIHMS969793-supplement-Legacy_Supplemental_File.pdf [file NIHMS969793-supplement-Legacy_Supplemental_File.pdf]

## Supplemental Material

### 17p12 Influences Hematoma Volume and Outcome in

### Spontaneous Intracerebral Hemorrhage

Sandro Marini, MD<sup>1</sup>; William J. Devan, BS<sup>1</sup>; Farid Radmanesh, MD MPH<sup>1</sup>; Laura Miyares, BS<sup>2</sup>; Timothy Poterba, BA<sup>3</sup>; Björn M. Hansen, MD<sup>4</sup>; Bo Norrving, MD<sup>4</sup>; Jordi Jimenez-Conde, MD; PhD<sup>5</sup>; Eva Giralt-Steinhauer, MD<sup>5</sup>; Roberto Elosua, MD PhD<sup>5</sup>; Elisa Cuadrado-Godia, MD<sup>5</sup>; Carolina Soriano, PhD BSc<sup>5</sup>; Jaume Roquer, MD PhD<sup>5</sup>; Christina E. Kourkoulis, BS<sup>1</sup>; Alison M. Ayres, BA<sup>6</sup>; Kristin Schwab, BA<sup>6</sup>; David L. Tirschwell, MD MSc<sup>7</sup>; Magdy Selim, MD PhD<sup>8</sup>; Devin L. Brown, MD MS<sup>9</sup>; Scott L. Silliman, MD<sup>10</sup>; Bradford B. Worrall, MD MSc<sup>11</sup>; James F. Meschia, MD<sup>12</sup>; Chelsea S. Kidwell, MD<sup>13</sup>; Joan Montaner, MD PhD<sup>14</sup>; Israel Fernandez-Cadenas, PhD<sup>14</sup>; Pilar Delgado, MD PhD<sup>14</sup>; Steven M. Greenberg, MD PhD<sup>6</sup>; Arne Lindgren, MD PhD<sup>4</sup>; Charles Matouk MD<sup>2</sup>; Kevin N. Sheth, MD<sup>2</sup>; Daniel Woo, MD MSc<sup>15</sup>; Christopher D. Anderson, MD MMSc<sup>1</sup>; Jonathan Rosand, MD MSc<sup>1</sup>; Guido J. Falcone, MD ScD MPH<sup>2</sup>  
on behalf of the International Stroke Genetics Consortium

#### Affiliations

- 1 Center for Genomic Medicine, Massachusetts General Hospital, Boston, MA, USA.
- 2 Division of Neurocritical Care and Emergency Neurology, Department of Neurology, Yale University School of Medicine, New Haven, Connecticut, USA
- 3 Analytic and Translational Genetics Unit, Massachusetts General Hospital, Boston, Massachusetts, USA
- 4 Department of Neurology and Rehabilitation, Skåne University Hospital, Lund, Sweden
- 5 Department of Neurology. IMIM-Hospital del Mar. Universidad Autónoma de Barcelona, Barcelona, Spain.
- 6 J. Philip Kistler Stroke Research Center, MGH, Boston, MA, USA
- 7 Stroke Center, Harborview Medical Center, University of Washington, Seattle WA, USA.
- 8 Department of Neurology, Stroke Division, Beth Israel Deaconess Medical Center, Boston, MA, USA.
- 9 Stroke Program, Department of Neurology, University of Michigan, Ann Arbor, MI, USA.
- 10 Department of Neurology, University of Florida College of Medicine, Jacksonville, FL, USA.
- 11 Department of Neurology and Public Health Sciences, University of Virginia Health System, Charlottesville, VA, USA.
- 12 Department of Neurology, Mayo Clinic, Jacksonville, FL, USA.
- 13 Department of Neurology, University of Arizona, Tucson, AZ, USA.
- 14 Neurovascular Research Laboratory and Neurovascular Unit, Institut de Recerca, Hospital Vall d'Hebron, Universitat Autònoma de Barcelona, Barcelona, Spain.
- 15 Department of Neurology and Rehabilitation Medicine, University of Cincinnati College of Medicine, Cincinnati, OH, USA.

**Supplemental Figure I.** Quantile-quantile plots for GWAS of ICH volume for non-lobar ICH and for lobar ICH in the discovery phase.

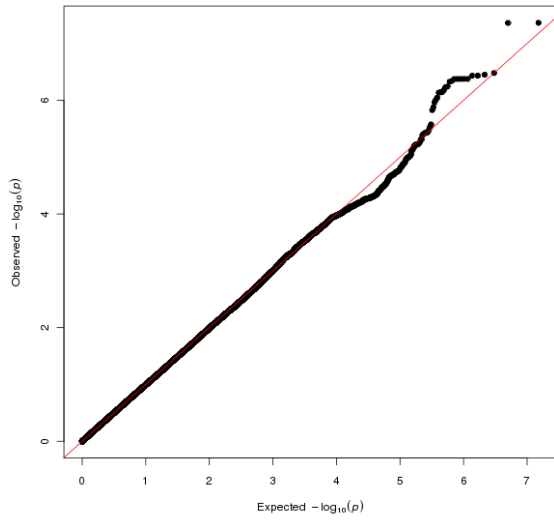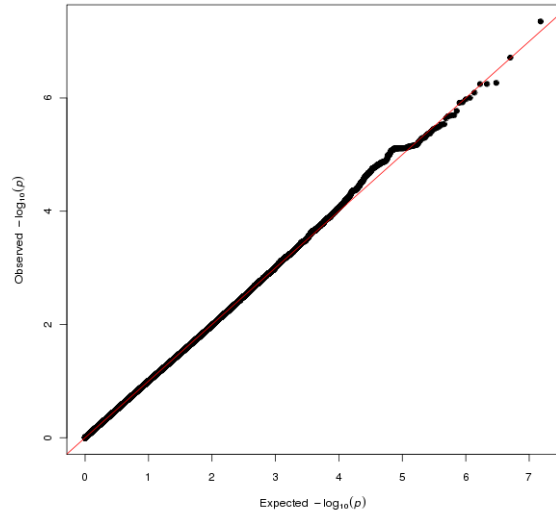

**Supplemental Figure II.** Histogram of ICH volume distribution in the discovery sample before and after log10 transformation

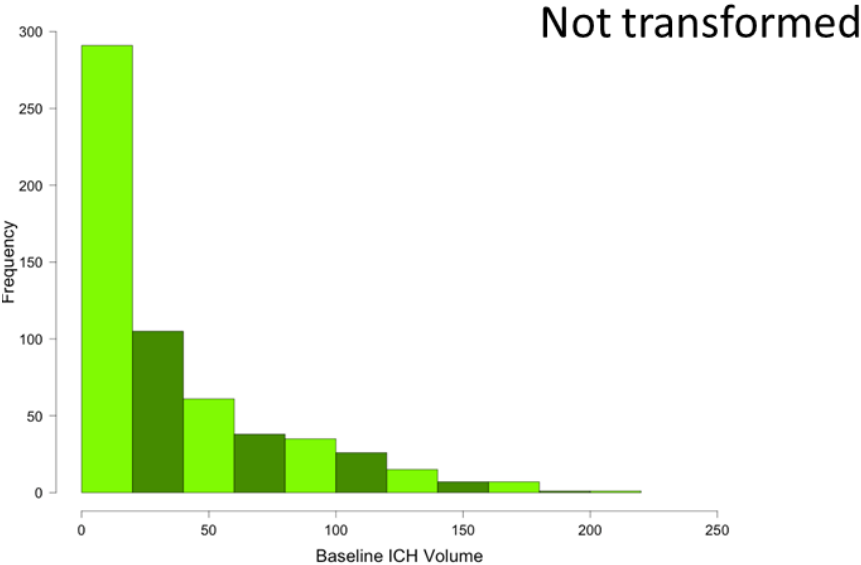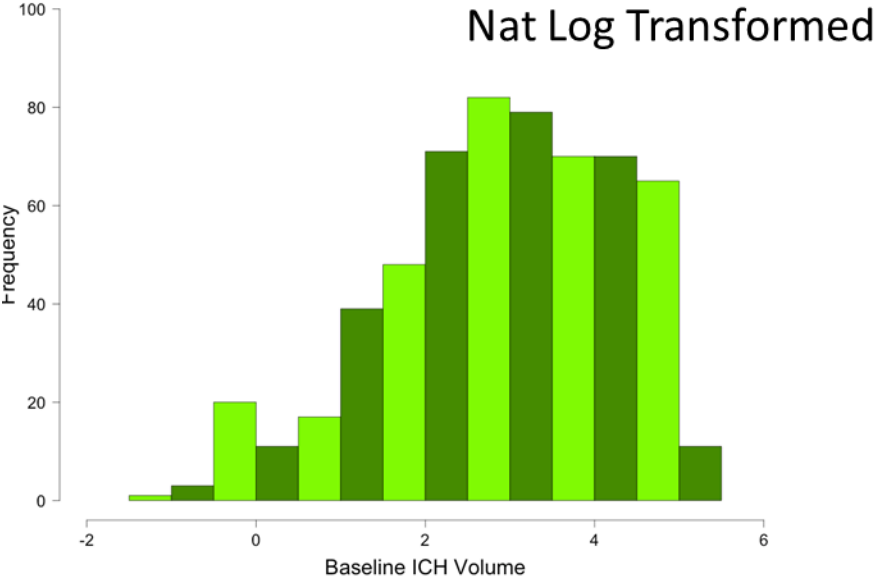

**Supplemental Figure III.** Visual representation of the CNVs mapped on the region 17p12 (Ensembl release 88 - Mar 2017) (reproduced from <https://useast.ensembl.org/index.html> with permission)

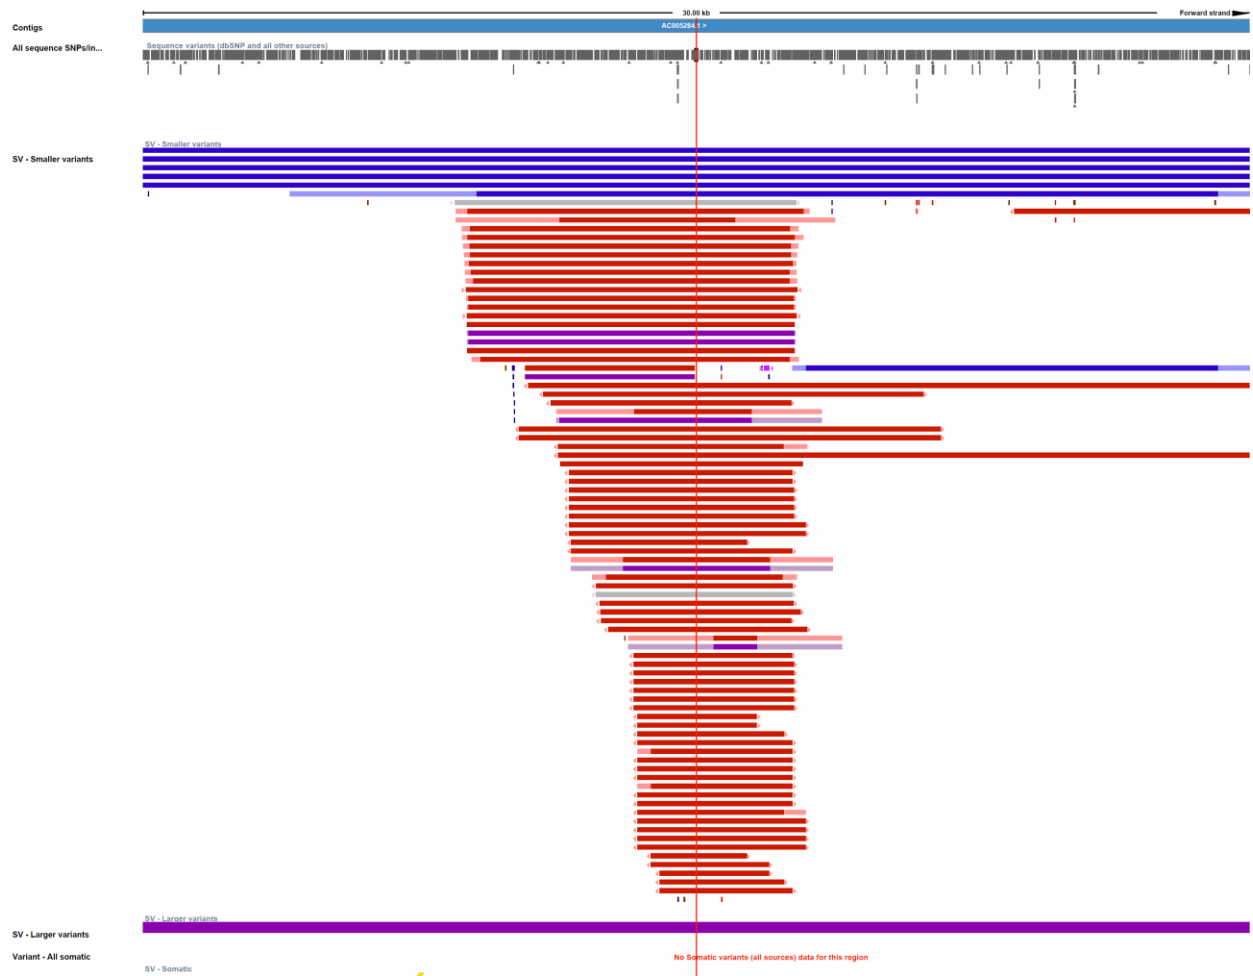

**Supplemental Table I. SNPs with  $p < 5 \times 10^{-5}$  for lobar ICH.**

| CHR | SNP         | BP        | A1 | A2 | FRQ    | BETA    | SE     | P        |
|-----|-------------|-----------|----|----|--------|---------|--------|----------|
| 22  | rs9614326   | 44499343  | A  | C  | 0.9701 | 1.8411  | 0.3232 | 4.45E-08 |
| 11  | rs117152110 | 70031136  | A  | G  | 0.9786 | 2.3133  | 0.4285 | 1.94E-07 |
| 6   | rs17080331  | 151121649 | C  | G  | 0.9829 | 1.8971  | 0.366  | 5.40E-07 |
| 6   | rs4869694   | 151121228 | C  | A  | 0.9829 | 1.8935  | 0.366  | 5.66E-07 |
| 6   | rs4869948   | 151121378 | G  | A  | 0.9829 | 1.8937  | 0.3661 | 5.67E-07 |
| 9   | rs10977803  | 9475806   | T  | C  | 0.983  | 2.1763  | 0.4269 | 8.05E-07 |
| 16  | rs12597663  | 66396875  | A  | G  | 0.6089 | 0.5554  | 0.1099 | 9.93E-07 |
| 16  | rs55933663  | 66396457  | T  | C  | 0.6071 | 0.5562  | 0.1103 | 1.05E-06 |
| 9   | 9-112766210 | 112766210 | C  | T  | 0.9894 | 2.9108  | 0.5805 | 1.19E-06 |
| 9   | 9-112770100 | 112770100 | G  | A  | 0.9894 | 2.9095  | 0.5808 | 1.22E-06 |
| 6   | rs115174801 | 151127513 | T  | C  | 0.9842 | 1.8829  | 0.3814 | 1.69E-06 |
| 13  | rs4519205   | 109251725 | G  | A  | 0.6343 | -0.5728 | 0.1169 | 2.01E-06 |
| 16  | rs12600111  | 66397106  | T  | C  | 0.6084 | 0.5578  | 0.1139 | 2.03E-06 |
| 6   | 6-151127694 | 151127694 | C  | T  | 0.9844 | 1.8727  | 0.3827 | 2.07E-06 |
| 6   | 6-151127712 | 151127712 | T  | C  | 0.9844 | 1.8715  | 0.3828 | 2.11E-06 |
| 6   | rs2002561   | 151126931 | G  | A  | 0.9817 | 1.7871  | 0.367  | 2.29E-06 |
| 16  | rs1370264   | 66387751  | G  | A  | 0.5779 | 0.5313  | 0.1103 | 2.89E-06 |
| 6   | 6-151127989 | 151127989 | G  | T  | 0.9847 | 1.8515  | 0.3845 | 2.93E-06 |
| 6   | rs117756969 | 151127995 | A  | G  | 0.9847 | 1.851   | 0.3845 | 2.95E-06 |
| 16  | rs2005727   | 66389438  | G  | A  | 0.5769 | 0.5289  | 0.1102 | 3.16E-06 |
| 6   | rs76521446  | 151128073 | T  | C  | 0.9847 | 1.8444  | 0.3849 | 3.25E-06 |
| 16  | rs11864740  | 66391884  | C  | T  | 0.5761 | 0.5284  | 0.1104 | 3.36E-06 |
| 6   | rs6924094   | 151128105 | C  | G  | 0.9848 | 1.8419  | 0.385  | 3.38E-06 |
| 6   | rs6922805   | 151128133 | G  | A  | 0.9848 | 1.8391  | 0.3852 | 3.52E-06 |
| 4   | rs28854506  | 113287105 | A  | G  | 0.9049 | 0.824   | 0.1726 | 3.54E-06 |
| 6   | rs6908190   | 151128190 | T  | G  | 0.9849 | 1.834   | 0.3854 | 3.78E-06 |
| 4   | rs1859140   | 113290045 | G  | A  | 0.9045 | 0.82    | 0.1726 | 3.91E-06 |
| 6   | rs6924455   | 151128275 | C  | G  | 0.9849 | 1.8258  | 0.3857 | 4.23E-06 |
| 6   | rs9467897   | 10905090  | C  | T  | 0.6648 | -0.5542 | 0.1171 | 4.23E-06 |
| 4   | rs113825919 | 113290753 | G  | A  | 0.9042 | 0.8166  | 0.1726 | 4.25E-06 |
| 6   | rs9322527   | 155900525 | A  | T  | 0.5765 | 0.5234  | 0.1108 | 4.45E-06 |
| 6   | rs9357021   | 10906154  | A  | G  | 0.6658 | -0.5513 | 0.1169 | 4.56E-06 |
| 6   | rs6903862   | 151128379 | A  | G  | 0.985  | 1.8153  | 0.3861 | 4.85E-06 |
| 6   | rs6923310   | 151128402 | G  | A  | 0.9851 | 1.8126  | 0.3861 | 5.02E-06 |
| 6   | rs2153159   | 10887932  | G  | T  | 0.514  | 0.5114  | 0.109  | 5.06E-06 |

|    |             |           |   |   |        |         |        |          |
|----|-------------|-----------|---|---|--------|---------|--------|----------|
| 1  | rs72690994  | 106081171 | C | T | 0.9076 | 0.8985  | 0.1915 | 5.07E-06 |
| 10 | rs6602177   | 17167141  | C | T | 0.3292 | 0.5701  | 0.1215 | 5.09E-06 |
| 17 | rs11651487  | 17444575  | G | A | 0.9898 | 2.7075  | 0.5777 | 5.18E-06 |
| 2  | rs1863171   | 173646251 | G | A | 0.9228 | 1.0353  | 0.2212 | 5.35E-06 |
| 6  | rs6923505   | 151128492 | G | A | 0.9851 | 1.8031  | 0.3864 | 5.67E-06 |
| 16 | rs55823757  | 66396264  | G | C | 0.5726 | 0.521   | 0.1117 | 5.73E-06 |
| 22 | rs5995384   | 37519667  | G | A | 0.6065 | 0.5864  | 0.126  | 5.94E-06 |
| 11 | rs6484657   | 33575536  | A | G | 0.3402 | -0.4966 | 0.107  | 6.37E-06 |
| 4  | rs10007654  | 113293712 | C | A | 0.8997 | 0.7906  | 0.1705 | 6.47E-06 |
| 20 | 20-21570370 | 21570370  | A | G | 0.9875 | 2.5481  | 0.5507 | 6.73E-06 |
| 6  | rs9393764   | 10906911  | G | A | 0.6502 | -0.5523 | 0.1194 | 6.74E-06 |
| 22 | rs28450477  | 37513316  | G | A | 0.6212 | 0.5548  | 0.1199 | 6.74E-06 |
| 4  | rs56233136  | 113294010 | C | T | 0.903  | 0.7941  | 0.1717 | 6.77E-06 |
| 11 | rs7479704   | 33573167  | A | G | 0.3409 | -0.4936 | 0.1067 | 6.79E-06 |
| 1  | rs708098    | 18203806  | C | T | 0.9766 | 1.8772  | 0.4063 | 6.95E-06 |
| 22 | rs9610651   | 37513067  | G | A | 0.6212 | 0.5528  | 0.1197 | 6.96E-06 |
| 22 | rs73406910  | 37512611  | C | T | 0.6213 | 0.5499  | 0.1191 | 6.98E-06 |
| 6  | rs2153157   | 10897488  | G | A | 0.5272 | 0.5112  | 0.1107 | 7.00E-06 |
| 22 | rs113528297 | 37512544  | G | A | 0.6213 | 0.5495  | 0.119  | 7.00E-06 |
| 22 | rs57804049  | 37512435  | T | C | 0.6213 | 0.5486  | 0.1189 | 7.07E-06 |
| 1  | rs611312    | 18205110  | A | G | 0.9769 | 1.9032  | 0.4125 | 7.13E-06 |
| 15 | 15-46091001 | 46091001  | A | C | 0.9746 | 1.6168  | 0.3504 | 7.14E-06 |
| 15 | 15-46095337 | 46095337  | C | T | 0.9745 | 1.6147  | 0.35   | 7.16E-06 |
| 15 | rs118096899 | 46082917  | G | A | 0.9748 | 1.618   | 0.3508 | 7.18E-06 |
| 15 | rs117181483 | 46081903  | T | C | 0.9748 | 1.6182  | 0.3509 | 7.20E-06 |
| 15 | rs117686163 | 46080548  | C | T | 0.9749 | 1.6183  | 0.351  | 7.22E-06 |
| 1  | rs621717    | 18205101  | G | C | 0.9769 | 1.906   | 0.4137 | 7.36E-06 |
| 15 | rs77991351  | 46102942  | G | T | 0.9743 | 1.6082  | 0.3492 | 7.41E-06 |
| 15 | rs75414650  | 46074457  | C | G | 0.9751 | 1.6168  | 0.3512 | 7.46E-06 |
| 3  | 3-133180108 | 133180108 | C | T | 0.9877 | 2.5593  | 0.5562 | 7.52E-06 |
| 15 | rs78536941  | 46072879  | A | C | 0.9752 | 1.6159  | 0.3512 | 7.55E-06 |
| 15 | 15-46072336 | 46072336  | A | G | 0.9752 | 1.6156  | 0.3512 | 7.58E-06 |
| 14 | 14-34062006 | 34062006  | T | A | 0.9702 | 1.4738  | 0.3205 | 7.64E-06 |
| 1  | rs490573    | 18201142  | G | T | 0.9766 | 1.868   | 0.4063 | 7.64E-06 |
| 6  | rs75697458  | 80141219  | A | C | 0.9852 | 2.075   | 0.4513 | 7.64E-06 |
| 6  | rs78625855  | 80141827  | G | A | 0.9852 | 2.0744  | 0.4512 | 7.66E-06 |
| 15 | rs116979004 | 46070676  | A | G | 0.9752 | 1.6144  | 0.3512 | 7.69E-06 |
| 15 | rs118017210 | 46070691  | C | T | 0.9752 | 1.6144  | 0.3512 | 7.69E-06 |
| 15 | rs75095611  | 46039068  | C | T | 0.9752 | 1.6142  | 0.3512 | 7.70E-06 |
| 15 | rs76940327  | 46058137  | C | T | 0.9752 | 1.6142  | 0.3512 | 7.70E-06 |
| 15 | rs77458144  | 46064698  | G | A | 0.9752 | 1.6142  | 0.3512 | 7.70E-06 |

|    |             |           |   |   |        |         |        |          |
|----|-------------|-----------|---|---|--------|---------|--------|----------|
| 15 | 15-46041160 | 46041160  | G | T | 0.9752 | 1.6142  | 0.3512 | 7.70E-06 |
| 15 | 15-46041356 | 46041356  | C | T | 0.9752 | 1.6142  | 0.3512 | 7.70E-06 |
| 15 | 15-46061859 | 46061859  | T | A | 0.9752 | 1.6142  | 0.3512 | 7.70E-06 |
| 15 | 15-46061865 | 46061865  | A | T | 0.9752 | 1.6142  | 0.3512 | 7.70E-06 |
| 15 | 15-46061875 | 46061875  | C | G | 0.9752 | 1.6142  | 0.3512 | 7.70E-06 |
| 15 | rs112282358 | 46066090  | G | A | 0.9752 | 1.6142  | 0.3512 | 7.70E-06 |
| 15 | rs117562296 | 46070098  | G | A | 0.9752 | 1.6142  | 0.3512 | 7.70E-06 |
| 15 | rs117619745 | 46051418  | C | T | 0.9752 | 1.6142  | 0.3512 | 7.70E-06 |
| 15 | rs117627982 | 46070394  | A | G | 0.9752 | 1.6142  | 0.3512 | 7.70E-06 |
| 15 | rs118127790 | 46052433  | C | G | 0.9752 | 1.6142  | 0.3512 | 7.70E-06 |
| 15 | rs118131182 | 46061758  | T | G | 0.9752 | 1.6142  | 0.3512 | 7.70E-06 |
| 6  | rs77831257  | 80145799  | A | G | 0.9852 | 2.0699  | 0.4504 | 7.72E-06 |
| 15 | rs74895151  | 46037827  | C | T | 0.9752 | 1.614   | 0.3512 | 7.73E-06 |
| 6  | 6-80169118  | 80169118  | G | A | 0.9851 | 2.0644  | 0.4494 | 7.78E-06 |
| 6  | 6-80170700  | 80170700  | G | A | 0.9851 | 2.0644  | 0.4494 | 7.78E-06 |
| 6  | 6-80171458  | 80171458  | T | C | 0.9851 | 2.0644  | 0.4494 | 7.78E-06 |
| 6  | rs16890740  | 80163791  | C | T | 0.9851 | 2.0644  | 0.4494 | 7.78E-06 |
| 6  | rs77763049  | 80171944  | C | A | 0.9851 | 2.0644  | 0.4494 | 7.78E-06 |
| 6  | rs116953035 | 80159753  | C | T | 0.9851 | 2.0644  | 0.4494 | 7.78E-06 |
| 6  | rs117323351 | 80173571  | C | T | 0.9851 | 2.0644  | 0.4494 | 7.78E-06 |
| 6  | rs117457928 | 80162866  | C | T | 0.9851 | 2.0644  | 0.4494 | 7.78E-06 |
| 6  | rs117461579 | 80171260  | G | C | 0.9851 | 2.0644  | 0.4494 | 7.78E-06 |
| 6  | rs117616180 | 80158256  | T | A | 0.9851 | 2.0644  | 0.4494 | 7.78E-06 |
| 6  | rs117906936 | 80161815  | C | T | 0.9851 | 2.0644  | 0.4494 | 7.78E-06 |
| 6  | rs16890745  | 80165256  | C | G | 0.9851 | 2.0643  | 0.4494 | 7.79E-06 |
| 2  | rs10930571  | 173627063 | A | T | 0.9208 | 0.9981  | 0.2174 | 7.84E-06 |
| 1  | rs545301    | 18199803  | C | T | 0.9766 | 1.8662  | 0.4064 | 7.85E-06 |
| 22 | rs59788868  | 37511618  | G | A | 0.6218 | 0.5397  | 0.1178 | 8.14E-06 |
| 22 | rs56912861  | 37511637  | G | A | 0.6219 | 0.5399  | 0.1178 | 8.16E-06 |
| 17 | rs117542645 | 39703360  | G | C | 0.9768 | 1.9353  | 0.4223 | 8.17E-06 |
| 14 | rs79751486  | 34078548  | C | T | 0.9707 | 1.5041  | 0.3284 | 8.24E-06 |
| 1  | rs984913    | 106087291 | C | T | 0.9345 | 1.1687  | 0.2552 | 8.28E-06 |
| 7  | rs117507992 | 137765737 | T | C | 0.9877 | 2.5888  | 0.5657 | 8.38E-06 |
| 6  | rs6923464   | 138320223 | C | T | 0.0564 | -1.1389 | 0.2489 | 8.38E-06 |
| 7  | rs77754487  | 137768690 | G | A | 0.9877 | 2.5884  | 0.5657 | 8.41E-06 |
| 22 | rs9607414   | 37517697  | C | T | 0.6656 | 0.5948  | 0.13   | 8.42E-06 |
| 11 | rs2076627   | 33581153  | T | C | 0.3341 | -0.4918 | 0.1076 | 8.53E-06 |
| 1  | rs665409    | 18195547  | C | T | 0.9762 | 1.8601  | 0.4068 | 8.53E-06 |
| 18 | rs12964268  | 33815800  | G | A | 0.7987 | 0.7257  | 0.1587 | 8.54E-06 |
| 8  | rs74425673  | 139357726 | G | A | 0.9756 | 1.7953  | 0.3939 | 9.08E-06 |
| 6  | rs77347767  | 151128621 | C | T | 0.9853 | 1.8258  | 0.4006 | 9.11E-06 |

|    |             |           |   |   |        |         |        |          |
|----|-------------|-----------|---|---|--------|---------|--------|----------|
| 7  | 7-23102128  | 23102128  | G | A | 0.9477 | 1.0894  | 0.2394 | 9.33E-06 |
| 12 | 12-34784534 | 34784534  | G | T | 0.9846 | 2.2261  | 0.4892 | 9.38E-06 |
| 2  | 2-122469004 | 122469004 | G | A | 0.9624 | 1.4891  | 0.3278 | 9.70E-06 |
| 6  | rs12214780  | 155901524 | T | C | 0.6727 | 0.5647  | 0.1245 | 1.01E-05 |
| 6  | rs12214783  | 155901534 | T | C | 0.6727 | 0.5647  | 0.1245 | 1.01E-05 |
| 4  | rs6830902   | 101511044 | A | G | 0.9705 | 1.4657  | 0.3234 | 1.02E-05 |
| 4  | rs76759930  | 101621945 | T | G | 0.9749 | 1.5946  | 0.3519 | 1.02E-05 |
| 4  | rs112791972 | 101618917 | T | A | 0.9749 | 1.5935  | 0.3517 | 1.02E-05 |
| 4  | rs112129629 | 101621213 | G | A | 0.9749 | 1.5942  | 0.3519 | 1.02E-05 |
| 4  | rs1508423   | 101617863 | C | A | 0.9749 | 1.593   | 0.3516 | 1.02E-05 |
| 4  | rs111504838 | 101619248 | A | G | 0.9749 | 1.5935  | 0.3518 | 1.02E-05 |
| 16 | rs904770    | 56702000  | T | C | 0.1291 | -0.7642 | 0.1688 | 1.04E-05 |
| 16 | rs59442025  | 66396141  | C | T | 0.5713 | 0.5021  | 0.1111 | 1.06E-05 |
| 12 | 12-34477625 | 34477625  | C | T | 0.9871 | 2.4038  | 0.5343 | 1.17E-05 |
| 6  | rs12524212  | 156000918 | A | T | 0.5951 | 0.5091  | 0.1133 | 1.19E-05 |
| 6  | rs118132432 | 69629495  | G | A | 0.9878 | 2.2384  | 0.4982 | 1.20E-05 |
| 12 | 12-34754062 | 34754062  | G | C | 0.9857 | 2.2048  | 0.491  | 1.21E-05 |
| 20 | rs73127899  | 21525856  | A | T | 0.9795 | 2.0349  | 0.4537 | 1.24E-05 |
| 2  | rs10206140  | 173656144 | G | C | 0.7397 | 0.5382  | 0.1201 | 1.25E-05 |
| 6  | 6-69629786  | 69629786  | A | G | 0.9883 | 2.3201  | 0.5179 | 1.27E-05 |
| 19 | 19-46891063 | 46891063  | C | T | 0.9789 | 1.8236  | 0.4071 | 1.27E-05 |
| 12 | 12-34795561 | 34795561  | T | C | 0.9872 | 2.4007  | 0.5362 | 1.28E-05 |
| 6  | 6-80166648  | 80166648  | C | T | 0.9861 | 2.1359  | 0.4772 | 1.29E-05 |
| 2  | rs3769315   | 173669843 | C | T | 0.7405 | 0.5368  | 0.12   | 1.30E-05 |
| 22 | rs9609515   | 32740795  | C | T | 0.8441 | 0.6696  | 0.1498 | 1.32E-05 |
| 18 | rs72863467  | 3919914   | C | T | 0.9864 | 2.213   | 0.495  | 1.32E-05 |
| 9  | rs73490714  | 101035397 | C | T | 0.9282 | 0.9235  | 0.2067 | 1.33E-05 |
| 9  | rs16914443  | 101035858 | T | C | 0.9282 | 0.9235  | 0.2067 | 1.33E-05 |
| 9  | rs76492605  | 101035708 | A | G | 0.9282 | 0.9235  | 0.2067 | 1.33E-05 |
| 9  | rs79550901  | 101035626 | A | G | 0.9282 | 0.9235  | 0.2067 | 1.33E-05 |
| 9  | rs73490718  | 101036920 | A | G | 0.9282 | 0.9234  | 0.2067 | 1.34E-05 |
| 9  | rs73490720  | 101036954 | C | T | 0.9282 | 0.9234  | 0.2067 | 1.34E-05 |
| 9  | rs61201457  | 101037990 | C | A | 0.9282 | 0.9233  | 0.2067 | 1.34E-05 |
| 9  | rs73490723  | 101038741 | C | G | 0.9282 | 0.9233  | 0.2067 | 1.34E-05 |
| 9  | rs73490727  | 101039351 | T | C | 0.9282 | 0.9232  | 0.2067 | 1.34E-05 |
| 9  | rs73490728  | 101039819 | A | C | 0.9282 | 0.9232  | 0.2067 | 1.34E-05 |
| 6  | rs62395384  | 10895575  | C | T | 0.5892 | -0.4894 | 0.1096 | 1.35E-05 |
| 11 | 11-13036001 | 13036001  | C | T | 0.9815 | 2.1145  | 0.4738 | 1.36E-05 |
| 9  | rs10985730  | 101040774 | T | G | 0.9281 | 0.9218  | 0.2066 | 1.37E-05 |
| 16 | rs1110645   | 66394194  | G | T | 0.569  | 0.4961  | 0.1112 | 1.37E-05 |
| 16 | rs1110647   | 66394280  | T | C | 0.569  | 0.4958  | 0.1111 | 1.37E-05 |



|    |             |           |   |   |        |         |        |          |
|----|-------------|-----------|---|---|--------|---------|--------|----------|
| 16 | rs1110646   | 66394247  | C | T | 0.569  | 0.4959  | 0.1112 | 1.37E-05 |
| 22 | rs5759099   | 43415711  | G | A | 0.9678 | 1.3796  | 0.3092 | 1.37E-05 |
| 16 | rs1110644   | 66394143  | A | G | 0.5689 | 0.4962  | 0.1112 | 1.37E-05 |
| 16 | rs4625720   | 66394967  | C | T | 0.569  | 0.495   | 0.111  | 1.38E-05 |
| 20 | 20-22035571 | 22035571  | C | T | 0.9871 | 2.403   | 0.5389 | 1.38E-05 |
| 14 | rs112177724 | 34080707  | C | T | 0.9722 | 1.493   | 0.3349 | 1.39E-05 |
| 4  | rs115980646 | 101527358 | T | C | 0.973  | 1.5073  | 0.3385 | 1.42E-05 |
| 2  | rs12473986  | 173682948 | C | T | 0.7407 | 0.5263  | 0.1182 | 1.43E-05 |
| 12 | rs1486880   | 34052490  | G | A | 0.986  | 2.1923  | 0.4926 | 1.44E-05 |
| 4  | rs114768070 | 101510435 | C | T | 0.973  | 1.504   | 0.338  | 1.44E-05 |
| 12 | 12-34765376 | 34765376  | G | C | 0.986  | 2.1952  | 0.4934 | 1.44E-05 |
| 12 | 12-34765383 | 34765383  | A | C | 0.986  | 2.1952  | 0.4934 | 1.44E-05 |
| 4  | rs1501105   | 101510262 | A | C | 0.973  | 1.5037  | 0.338  | 1.44E-05 |
| 2  | rs3769313   | 173675340 | C | T | 0.7407 | 0.5297  | 0.1191 | 1.45E-05 |
| 8  | rs117426483 | 139313452 | T | A | 0.9777 | 1.7903  | 0.4025 | 1.45E-05 |
| 2  | 2-21121335  | 21121335  | C | T | 0.9889 | 2.6497  | 0.5959 | 1.46E-05 |
| 4  | rs76225673  | 101507730 | G | A | 0.9728 | 1.5004  | 0.3375 | 1.46E-05 |
| 4  | rs116056384 | 101508039 | C | A | 0.9729 | 1.4996  | 0.3375 | 1.48E-05 |
| 14 | 14-34069832 | 34069832  | T | C | 0.9846 | 2.0389  | 0.4592 | 1.50E-05 |
| 12 | 12-34735874 | 34735874  | G | A | 0.9844 | 1.9987  | 0.4502 | 1.51E-05 |
| 12 | 12-34748748 | 34748748  | G | A | 0.9844 | 1.9987  | 0.4502 | 1.51E-05 |
| 12 | 12-34796643 | 34796643  | G | A | 0.9844 | 1.9987  | 0.4502 | 1.51E-05 |
| 2  | rs116474894 | 62592963  | G | A | 0.9736 | 1.5132  | 0.3409 | 1.51E-05 |
| 13 | rs113651977 | 85915533  | C | G | 0.367  | -0.5893 | 0.1327 | 1.51E-05 |
| 12 | 12-34647503 | 34647503  | T | A | 0.9844 | 1.9973  | 0.45   | 1.51E-05 |
| 12 | 12-34663860 | 34663860  | T | C | 0.9844 | 1.9973  | 0.45   | 1.51E-05 |
| 12 | 12-34667923 | 34667923  | C | T | 0.9844 | 1.9973  | 0.45   | 1.51E-05 |
| 12 | 12-34679276 | 34679276  | G | A | 0.9844 | 1.9983  | 0.4502 | 1.51E-05 |
| 22 | rs73166359  | 32745565  | C | A | 0.843  | 0.6673  | 0.1504 | 1.51E-05 |
| 2  | 2-62581396  | 62581396  | C | T | 0.9674 | 1.3799  | 0.311  | 1.52E-05 |
| 12 | 12-34261837 | 34261837  | T | C | 0.986  | 2.1724  | 0.4897 | 1.52E-05 |
| 13 | rs9546258   | 83460927  | T | G | 0.0743 | -0.9562 | 0.2157 | 1.54E-05 |
| 16 | rs76475991  | 56699479  | G | A | 0.8932 | 0.794   | 0.1792 | 1.56E-05 |
| 12 | rs76248098  | 34182758  | A | G | 0.9845 | 1.9923  | 0.45   | 1.59E-05 |
| 12 | 12-34219102 | 34219102  | C | A | 0.9845 | 1.9922  | 0.45   | 1.59E-05 |
| 6  | rs676075    | 96448163  | A | G | 0.4033 | -0.4967 | 0.1122 | 1.59E-05 |
| 12 | 12-34386299 | 34386299  | G | A | 0.9845 | 1.9918  | 0.45   | 1.59E-05 |
| 12 | 12-34400927 | 34400927  | A | G | 0.9845 | 1.9918  | 0.45   | 1.59E-05 |
| 12 | 12-34840998 | 34840998  | G | A | 0.9834 | 2.1562  | 0.4873 | 1.60E-05 |
| 22 | rs9606940   | 32746172  | C | T | 0.8425 | 0.6657  | 0.1505 | 1.62E-05 |
| 1  | rs35283724  | 3356528   | C | T | 0.9831 | 1.9264  | 0.4358 | 1.63E-05 |

|    |             |           |   |   |        |         |        |          |
|----|-------------|-----------|---|---|--------|---------|--------|----------|
| 4  | rs111667479 | 101618892 | A | T | 0.9753 | 1.5574  | 0.3524 | 1.64E-05 |
| 6  | rs577966    | 96446252  | G | A | 0.4034 | -0.4958 | 0.1122 | 1.64E-05 |
| 6  | rs612612    | 96444545  | G | A | 0.4035 | -0.4956 | 0.1122 | 1.65E-05 |
| 6  | rs630589    | 96443901  | A | G | 0.4035 | -0.4956 | 0.1122 | 1.65E-05 |
| 16 | rs1123494   | 66395544  | G | T | 0.5668 | 0.4875  | 0.1104 | 1.65E-05 |
| 12 | 12-34084786 | 34084786  | C | T | 0.9846 | 1.9926  | 0.4513 | 1.66E-05 |
| 12 | rs116496642 | 34037082  | G | A | 0.9862 | 2.1797  | 0.4937 | 1.66E-05 |
| 7  | rs59981375  | 28420652  | G | A | 0.9661 | 1.3921  | 0.3154 | 1.67E-05 |
| 3  | rs812393    | 21918407  | T | C | 0.3446 | -0.5215 | 0.1182 | 1.68E-05 |
| 3  | rs779036    | 21919039  | G | A | 0.3441 | -0.5206 | 0.118  | 1.69E-05 |
| 3  | rs779035    | 21919327  | T | C | 0.344  | -0.5206 | 0.118  | 1.69E-05 |
| 3  | rs809647    | 21919672  | G | A | 0.344  | -0.5206 | 0.118  | 1.70E-05 |
| 12 | 12-34126581 | 34126581  | T | C | 0.9846 | 1.9894  | 0.4511 | 1.70E-05 |
| 12 | 12-34175795 | 34175795  | G | A | 0.9846 | 1.9892  | 0.4511 | 1.70E-05 |
| 12 | 12-34229242 | 34229242  | A | T | 0.9846 | 1.9889  | 0.4511 | 1.71E-05 |
| 12 | 12-34425655 | 34425655  | C | T | 0.9846 | 1.9884  | 0.4511 | 1.72E-05 |
| 13 | rs2633056   | 83556654  | T | A | 0.9254 | 0.9512  | 0.2158 | 1.72E-05 |
| 18 | rs80130983  | 3894971   | C | T | 0.9867 | 2.2281  | 0.5056 | 1.73E-05 |
| 12 | rs77558071  | 34091213  | G | T | 0.9847 | 1.9881  | 0.4512 | 1.73E-05 |
| 13 | rs1926538   | 109263355 | A | T | 0.2303 | 0.5488  | 0.1246 | 1.74E-05 |
| 1  | rs75982309  | 173074097 | T | C | 0.987  | 2.4058  | 0.5462 | 1.74E-05 |
| 1  | rs79737372  | 173079320 | C | T | 0.987  | 2.4058  | 0.5462 | 1.74E-05 |
| 16 | rs60219682  | 4261552   | C | T | 0.929  | 1.0996  | 0.2497 | 1.74E-05 |
| 16 | 16-24586144 | 24586144  | T | C | 0.8586 | 0.784   | 0.178  | 1.75E-05 |
| 12 | rs16921347  | 34022582  | C | T | 0.9863 | 2.1743  | 0.4939 | 1.76E-05 |
| 12 | 12-34465650 | 34465650  | G | T | 0.9898 | 2.7991  | 0.636  | 1.77E-05 |
| 2  | rs11687661  | 79887830  | C | T | 0.7153 | 0.5137  | 0.1168 | 1.79E-05 |
| 7  | rs75928819  | 23070400  | T | A | 0.9461 | 1.0164  | 0.2311 | 1.79E-05 |
| 1  | 1-188378512 | 188378512 | C | T | 0.9815 | 1.9314  | 0.4393 | 1.80E-05 |
| 7  | rs55921023  | 23069783  | T | C | 0.9461 | 1.0151  | 0.231  | 1.81E-05 |
| 7  | rs117256703 | 23069162  | G | C | 0.946  | 1.013   | 0.2308 | 1.86E-05 |
| 7  | rs77718475  | 23068677  | G | A | 0.946  | 1.012   | 0.2307 | 1.88E-05 |
| 8  | rs77309429  | 137125398 | C | T | 0.9529 | 1.163   | 0.2653 | 1.90E-05 |
| 6  | rs117805500 | 69566355  | G | A | 0.9872 | 2.1895  | 0.4996 | 1.91E-05 |
| 1  | rs72690992  | 106080175 | G | A | 0.9117 | 0.8391  | 0.1915 | 1.91E-05 |
| 21 | rs4816423   | 33525636  | A | G | 0.0161 | -2.0095 | 0.4585 | 1.91E-05 |
| 21 | rs2096462   | 33522718  | A | G | 0.0162 | -1.9994 | 0.4563 | 1.92E-05 |
| 1  | rs545374    | 18199775  | C | T | 0.9739 | 1.6729  | 0.3819 | 1.93E-05 |
| 21 | rs2186266   | 33522386  | T | G | 0.0162 | -1.9976 | 0.456  | 1.93E-05 |
| 7  | rs17156649  | 28420420  | G | A | 0.9831 | 1.9703  | 0.4498 | 1.93E-05 |
| 1  | rs10430089  | 106072399 | T | C | 0.9075 | 0.8184  | 0.1869 | 1.94E-05 |

|    |             |           |   |   |        |         |        |          |
|----|-------------|-----------|---|---|--------|---------|--------|----------|
| 1  | rs72690986  | 106076136 | A | G | 0.9118 | 0.8383  | 0.1915 | 1.94E-05 |
| 1  | rs72690985  | 106074908 | A | G | 0.9118 | 0.8381  | 0.1914 | 1.95E-05 |
| 1  | rs777064    | 106083957 | C | T | 0.8767 | 0.7823  | 0.1789 | 1.99E-05 |
| 21 | rs8130204   | 33518351  | G | T | 0.0162 | -1.9805 | 0.4532 | 2.01E-05 |
| 6  | rs12189591  | 138344875 | C | T | 0.958  | 1.3174  | 0.3016 | 2.03E-05 |
| 1  | rs12120387  | 24533481  | G | C | 0.7196 | 0.5466  | 0.1253 | 2.07E-05 |
| 11 | rs75973536  | 34091287  | A | C | 0.9898 | 2.5761  | 0.5905 | 2.08E-05 |
| 11 | rs11214217  | 96614991  | G | T | 0.9505 | 1.2562  | 0.288  | 2.08E-05 |
| 6  | 6-69612040  | 69612040  | C | G | 0.9871 | 2.1786  | 0.4996 | 2.09E-05 |
| 5  | 5-28368653  | 28368653  | C | T | 0.9751 | 1.5492  | 0.3553 | 2.09E-05 |
| 11 | rs11032512  | 34122057  | A | G | 0.9898 | 2.5679  | 0.5889 | 2.10E-05 |
| 1  | 1-173027482 | 173027482 | G | A | 0.9865 | 2.2873  | 0.5246 | 2.10E-05 |
| 5  | rs79358987  | 28370940  | G | A | 0.9751 | 1.5489  | 0.3552 | 2.10E-05 |
| 2  | rs113416273 | 925081    | T | C | 0.8105 | 0.6736  | 0.1545 | 2.10E-05 |
| 5  | rs77337744  | 28364769  | A | G | 0.9751 | 1.5487  | 0.3552 | 2.10E-05 |
| 5  | rs77930767  | 28366993  | T | G | 0.9751 | 1.5487  | 0.3552 | 2.10E-05 |
| 5  | rs80184141  | 28364917  | T | C | 0.9751 | 1.5487  | 0.3552 | 2.10E-05 |
| 5  | rs75871596  | 28360630  | C | G | 0.9751 | 1.5489  | 0.3553 | 2.11E-05 |
| 5  | rs78104455  | 28368455  | C | T | 0.9751 | 1.5488  | 0.3553 | 2.11E-05 |
| 5  | rs115519471 | 28368818  | G | A | 0.9751 | 1.5488  | 0.3554 | 2.11E-05 |
| 22 | rs9610652   | 37514024  | T | C | 0.6333 | 0.5299  | 0.1216 | 2.12E-05 |
| 3  | 3-66814376  | 66814376  | G | A | 0.9834 | 2.1652  | 0.4969 | 2.12E-05 |
| 5  | rs1445824   | 165306672 | T | A | 0.9081 | 0.8637  | 0.1983 | 2.14E-05 |
| 9  | rs7046297   | 33529263  | T | C | 0.8794 | 0.8037  | 0.1846 | 2.16E-05 |
| 4  | 4-101491699 | 101491699 | C | T | 0.9748 | 1.5289  | 0.3515 | 2.19E-05 |
| 5  | rs76395072  | 28372434  | T | A | 0.9751 | 1.5461  | 0.3555 | 2.20E-05 |
| 2  | rs78930539  | 902797    | C | G | 0.8568 | 0.7426  | 0.1709 | 2.23E-05 |
| 5  | rs115939278 | 28357395  | T | C | 0.9753 | 1.5547  | 0.3581 | 2.26E-05 |
| 11 | 11-34183568 | 34183568  | T | C | 0.9897 | 2.5619  | 0.5901 | 2.26E-05 |
| 1  | rs472495    | 55521313  | G | T | 0.3187 | -0.5247 | 0.1209 | 2.27E-05 |
| 5  | rs7717880   | 28373811  | C | T | 0.9752 | 1.543   | 0.3555 | 2.27E-05 |
| 5  | rs80086926  | 28374184  | G | A | 0.9752 | 1.5429  | 0.3555 | 2.28E-05 |
| 5  | rs78010921  | 28353926  | C | A | 0.974  | 1.5359  | 0.3539 | 2.28E-05 |
| 5  | rs75464284  | 28374167  | G | A | 0.9752 | 1.5431  | 0.3555 | 2.28E-05 |
| 5  | rs77305172  | 28375205  | A | G | 0.9752 | 1.543   | 0.3556 | 2.29E-05 |
| 5  | 5-165305241 | 165305241 | G | A | 0.9082 | 0.8608  | 0.1984 | 2.29E-05 |
| 20 | rs73127525  | 21007075  | G | A | 0.913  | 0.9614  | 0.2216 | 2.30E-05 |
| 5  | rs78516409  | 28376893  | C | T | 0.9752 | 1.5425  | 0.3556 | 2.30E-05 |
| 5  | rs28718014  | 28378230  | T | C | 0.9752 | 1.541   | 0.3556 | 2.35E-05 |
| 16 | rs9783759   | 66388834  | A | G | 0.5668 | 0.484   | 0.1117 | 2.36E-05 |
| 5  | rs80276900  | 28378824  | T | C | 0.9752 | 1.5403  | 0.3557 | 2.37E-05 |

|    |             |           |   |   |        |         |        |          |
|----|-------------|-----------|---|---|--------|---------|--------|----------|
| 16 | rs8053900   | 78392510  | G | A | 0.9697 | 1.5072  | 0.348  | 2.37E-05 |
| 5  | 5-28378931  | 28378931  | T | G | 0.9752 | 1.5402  | 0.3557 | 2.38E-05 |
| 6  | rs12530271  | 155986781 | C | T | 0.5957 | 0.4963  | 0.1146 | 2.39E-05 |
| 5  | 5-28379557  | 28379557  | G | T | 0.9752 | 1.5394  | 0.3557 | 2.40E-05 |
| 16 | rs8054901   | 78391804  | T | C | 0.9696 | 1.5056  | 0.348  | 2.41E-05 |
| 1  | rs693668    | 55521109  | G | A | 0.3183 | -0.523  | 0.1209 | 2.42E-05 |
| 12 | 12-34002721 | 34002721  | C | T | 0.9852 | 1.9582  | 0.4528 | 2.43E-05 |
| 5  | rs74503154  | 28380188  | T | C | 0.9752 | 1.5378  | 0.3558 | 2.45E-05 |
| 16 | rs9783760   | 66388785  | G | A | 0.567  | 0.4832  | 0.1118 | 2.45E-05 |
| 16 | rs35983101  | 66396994  | C | T | 0.7173 | 0.5222  | 0.1208 | 2.45E-05 |
| 12 | rs77516149  | 33995038  | G | T | 0.9852 | 1.9563  | 0.4528 | 2.47E-05 |
| 1  | rs11249030  | 24535294  | G | A | 0.7034 | 0.5399  | 0.125  | 2.49E-05 |
| 12 | 12-33848650 | 33848650  | T | C | 0.9852 | 1.9553  | 0.4528 | 2.49E-05 |
| 1  | rs4652865   | 35340821  | A | G | 0.1933 | -0.6562 | 0.152  | 2.49E-05 |
| 16 | rs2344423   | 66392966  | A | C | 0.5653 | 0.4837  | 0.1121 | 2.53E-05 |
| 5  | rs75908954  | 28382403  | G | T | 0.9752 | 1.5349  | 0.3558 | 2.55E-05 |
| 16 | rs1972836   | 66390850  | G | A | 0.5685 | 0.4848  | 0.1124 | 2.55E-05 |
| 1  | rs35115189  | 54664001  | T | C | 0.8896 | 0.8145  | 0.1889 | 2.56E-05 |
| 16 | rs6499077   | 66392480  | C | G | 0.5662 | 0.4831  | 0.112  | 2.56E-05 |
| 14 | rs59223062  | 34057693  | G | C | 0.95   | 1.1142  | 0.2585 | 2.59E-05 |
| 2  | rs435931    | 70801802  | C | G | 0.9136 | 0.9476  | 0.2199 | 2.60E-05 |
| 16 | rs4783575   | 66391517  | A | G | 0.5662 | 0.4824  | 0.112  | 2.61E-05 |
| 12 | rs7306706   | 6215634   | A | G | 0.5866 | -0.4689 | 0.1089 | 2.64E-05 |
| 1  | rs12121192  | 24531432  | C | T | 0.7189 | 0.542   | 0.1259 | 2.65E-05 |
| 6  | rs9379932   | 10906988  | A | T | 0.6388 | -0.5178 | 0.1204 | 2.68E-05 |
| 5  | rs77246256  | 28351550  | A | G | 0.973  | 1.5018  | 0.3493 | 2.70E-05 |
| 8  | rs72682548  | 121751200 | A | T | 0.9839 | 1.9663  | 0.4575 | 2.72E-05 |
| 18 | rs78542372  | 51136137  | T | C | 0.9325 | 0.9081  | 0.2114 | 2.74E-05 |
| 3  | rs13084230  | 164348898 | C | T | 0.7887 | -0.5448 | 0.1269 | 2.78E-05 |
| 16 | rs11646613  | 65231210  | G | A | 0.9109 | 0.829   | 0.1932 | 2.80E-05 |
| 18 | rs658977    | 53213887  | G | A | 0.797  | 0.5754  | 0.1342 | 2.82E-05 |
| 6  | rs12213390  | 155904577 | C | G | 0.6113 | 0.496   | 0.1157 | 2.83E-05 |
| 5  | 5-28392712  | 28392712  | C | T | 0.9753 | 1.5302  | 0.3569 | 2.83E-05 |
| 2  | rs6742877   | 222540194 | A | G | 0.9084 | 0.7741  | 0.1806 | 2.85E-05 |
| 14 | rs11160746  | 103812575 | T | C | 0.8317 | 0.6371  | 0.1487 | 2.87E-05 |
| 6  | rs72998667  | 155997355 | C | T | 0.5887 | 0.4811  | 0.1123 | 2.89E-05 |
| 6  | rs72998666  | 155997115 | G | A | 0.5888 | 0.4809  | 0.1123 | 2.91E-05 |
| 7  | rs12019361  | 87573647  | G | A | 0.953  | 1.1255  | 0.263  | 2.94E-05 |
| 19 | rs45595831  | 43083043  | T | A | 0.9658 | 1.4896  | 0.3484 | 2.98E-05 |
| 4  | rs114034011 | 11469287  | G | A | 0.9822 | 1.7969  | 0.4203 | 2.98E-05 |
| 6  | rs72994693  | 155910583 | T | G | 0.6108 | 0.4952  | 0.1158 | 2.98E-05 |

|    |             |           |   |   |        |         |        |          |
|----|-------------|-----------|---|---|--------|---------|--------|----------|
| 2  | rs74173180  | 176624528 | C | T | 0.1813 | 0.6758  | 0.1581 | 3.00E-05 |
| 6  | rs3920055   | 155996142 | A | G | 0.5893 | 0.4799  | 0.1123 | 3.00E-05 |
| 2  | rs10190173  | 222537746 | C | A | 0.9094 | 0.7774  | 0.1819 | 3.00E-05 |
| 6  | rs72994685  | 155908174 | C | G | 0.6109 | 0.4948  | 0.1158 | 3.01E-05 |
| 9  | rs10977797  | 9470026   | G | A | 0.9639 | 1.2912  | 0.3023 | 3.03E-05 |
| 16 | rs12918251  | 66381506  | C | G | 0.5598 | 0.4757  | 0.1114 | 3.05E-05 |
| 3  | rs74881817  | 141419082 | C | T | 0.9334 | 0.9938  | 0.2328 | 3.06E-05 |
| 18 | rs111679959 | 51137909  | A | C | 0.9324 | 0.905   | 0.212  | 3.06E-05 |
| 12 | rs12820832  | 94282431  | G | A | 0.4551 | 0.4856  | 0.1138 | 3.07E-05 |
| 2  | rs78075693  | 48191406  | T | A | 0.9492 | 1.1237  | 0.2633 | 3.07E-05 |
| 5  | rs74380912  | 122543510 | G | A | 0.9878 | 2.2001  | 0.5155 | 3.08E-05 |
| 6  | rs72998654  | 155993794 | T | C | 0.6133 | 0.4905  | 0.115  | 3.11E-05 |
| 16 | rs8057351   | 66386369  | T | C | 0.5638 | 0.4762  | 0.1116 | 3.11E-05 |
| 3  | 3-106354880 | 106354880 | C | A | 0.9714 | 1.6321  | 0.3827 | 3.11E-05 |
| 16 | rs2079284   | 66380861  | C | T | 0.5594 | 0.4743  | 0.1112 | 3.12E-05 |
| 16 | rs6499072   | 66379992  | A | G | 0.5594 | 0.4743  | 0.1112 | 3.12E-05 |
| 16 | rs34978821  | 66383099  | T | C | 0.5594 | 0.4743  | 0.1112 | 3.12E-05 |
| 14 | rs60126828  | 34073208  | C | A | 0.9506 | 1.1191  | 0.2626 | 3.14E-05 |
| 13 | rs1926518   | 109265714 | C | A | 0.7722 | -0.5351 | 0.1256 | 3.16E-05 |
| 10 | 10-34352360 | 34352360  | A | C | 0.9796 | 1.9543  | 0.4588 | 3.18E-05 |
| 9  | rs12344990  | 130902596 | C | G | 0.9434 | -1.0669 | 0.2505 | 3.18E-05 |
| 6  | rs7774493   | 155993192 | G | T | 0.5848 | 0.4775  | 0.1121 | 3.19E-05 |
| 4  | rs73814031  | 11467604  | C | G | 0.9821 | 1.7885  | 0.4202 | 3.23E-05 |
| 16 | rs8057163   | 78396770  | G | A | 0.9698 | 1.478   | 0.3474 | 3.24E-05 |
| 16 | rs6499071   | 66378856  | T | C | 0.5594 | 0.4732  | 0.1113 | 3.26E-05 |
| 14 | rs7159407   | 34076561  | T | G | 0.9505 | 1.1175  | 0.2628 | 3.28E-05 |
| 1  | rs12024858  | 106081125 | A | T | 0.9061 | 0.8024  | 0.1887 | 3.29E-05 |
| 3  | rs113681806 | 141420129 | G | A | 0.9333 | 0.988   | 0.2325 | 3.31E-05 |
| 18 | rs17438845  | 51124173  | G | A | 0.9389 | 0.9721  | 0.2288 | 3.31E-05 |
| 10 | 10-25397641 | 25397641  | A | G | 0.9882 | 2.4403  | 0.5747 | 3.35E-05 |
| 20 | rs117988968 | 15806765  | T | C | 0.9768 | 1.7508  | 0.4125 | 3.38E-05 |
| 14 | rs8020483   | 103808472 | C | T | 0.8342 | 0.6145  | 0.1449 | 3.42E-05 |
| 3  | rs76645186  | 310555    | G | T | 0.9113 | 0.7852  | 0.1852 | 3.46E-05 |
| 13 | rs111775283 | 98669538  | C | G | 0.9836 | 2.1349  | 0.5043 | 3.53E-05 |
| 1  | rs471705    | 55521242  | T | G | 0.3256 | -0.5146 | 0.1216 | 3.54E-05 |
| 12 | 12-33815838 | 33815838  | G | A | 0.9849 | 1.9257  | 0.4549 | 3.54E-05 |
| 2  | rs10209697  | 222549197 | G | A | 0.9097 | 0.7791  | 0.1841 | 3.56E-05 |
| 3  | rs112028893 | 141422557 | C | T | 0.9336 | 0.981   | 0.2318 | 3.56E-05 |
| 2  | rs73081645  | 222533355 | A | G | 0.9106 | 0.7721  | 0.1825 | 3.57E-05 |
| 10 | 10-34358680 | 34358680  | C | T | 0.9797 | 1.9381  | 0.4581 | 3.57E-05 |
| 16 | rs7198762   | 66386711  | G | A | 0.6906 | 0.4963  | 0.1173 | 3.58E-05 |

|    |             |           |   |   |        |         |        |          |
|----|-------------|-----------|---|---|--------|---------|--------|----------|
| 9  | rs16914199  | 101011129 | T | G | 0.926  | 0.8668  | 0.2049 | 3.59E-05 |
| 10 | 10-34339595 | 34339595  | G | A | 0.98   | 1.954   | 0.4621 | 3.60E-05 |
| 18 | rs8098032   | 53239302  | T | C | 0.7995 | 0.5669  | 0.1341 | 3.61E-05 |
| 7  | rs6966518   | 8797110   | C | T | 0.6658 | 0.5118  | 0.1211 | 3.62E-05 |
| 4  | rs115736967 | 149271953 | T | C | 0.9851 | 2.1902  | 0.5181 | 3.62E-05 |
| 2  | rs113964720 | 222549627 | G | A | 0.9101 | 0.7822  | 0.185  | 3.63E-05 |
| 9  | rs7028182   | 110571327 | T | G | 0.4496 | 0.4829  | 0.1143 | 3.66E-05 |
| 10 | rs12360149  | 89931183  | C | A | 0.8787 | 0.6973  | 0.165  | 3.66E-05 |
| 2  | rs112833016 | 222549759 | C | T | 0.9102 | 0.7828  | 0.1853 | 3.68E-05 |
| 6  | rs72994676  | 155903431 | G | A | 0.6086 | 0.4912  | 0.1163 | 3.69E-05 |
| 16 | rs8051828   | 66379063  | A | T | 0.5598 | 0.4703  | 0.1114 | 3.71E-05 |
| 2  | rs11676731  | 222532542 | G | A | 0.9108 | 0.7703  | 0.1825 | 3.71E-05 |
| 20 | 20-41531325 | 41531325  | T | G | 0.9837 | 2.0552  | 0.4871 | 3.74E-05 |
| 3  | rs17195435  | 141425465 | A | G | 0.9339 | 0.9749  | 0.2311 | 3.75E-05 |
| 12 | rs1859194   | 113212746 | T | G | 0.9521 | 1.1201  | 0.2655 | 3.76E-05 |
| 5  | rs79810792  | 28349112  | A | T | 0.972  | 1.4418  | 0.3419 | 3.78E-05 |
| 9  | rs1474334   | 110565722 | G | A | 0.4505 | 0.474   | 0.1125 | 3.81E-05 |
| 3  | rs7635204   | 164335297 | C | G | 0.8046 | -0.5545 | 0.1316 | 3.83E-05 |
| 5  | 5-28348869  | 28348869  | T | C | 0.972  | 1.4393  | 0.3416 | 3.84E-05 |
| 12 | rs11107237  | 94282149  | C | T | 0.4723 | 0.485   | 0.1151 | 3.84E-05 |
| 18 | 18-68406238 | 68406238  | G | A | 0.9864 | 2.224   | 0.5279 | 3.85E-05 |
| 12 | 12-33813164 | 33813164  | C | G | 0.9848 | 1.9147  | 0.4547 | 3.87E-05 |
| 18 | rs12963873  | 53215142  | T | A | 0.8022 | 0.5683  | 0.135  | 3.87E-05 |
| 18 | rs581653    | 53215739  | A | T | 0.8022 | 0.5683  | 0.135  | 3.88E-05 |
| 16 | rs13380587  | 66384493  | A | G | 0.6878 | 0.4945  | 0.1175 | 3.91E-05 |
| 12 | 12-34129062 | 34129062  | G | A | 0.981  | 1.7823  | 0.4235 | 3.92E-05 |
| 12 | rs12312642  | 33811200  | A | T | 0.9818 | 1.7684  | 0.4203 | 3.93E-05 |
| 11 | rs4755192   | 33571665  | A | G | 0.3265 | -0.4519 | 0.1075 | 3.96E-05 |
| 3  | rs3732711   | 164338289 | A | G | 0.8391 | -0.5948 | 0.1415 | 3.98E-05 |
| 3  | rs11917341  | 164335502 | A | G | 0.8391 | -0.5948 | 0.1415 | 3.98E-05 |
| 3  | rs13074976  | 164335246 | A | G | 0.8391 | -0.5948 | 0.1415 | 3.98E-05 |
| 3  | rs34419518  | 164334190 | G | A | 0.8391 | -0.5948 | 0.1415 | 3.98E-05 |
| 3  | rs67273732  | 164328217 | G | A | 0.8391 | -0.5948 | 0.1415 | 3.98E-05 |
| 20 | 20-10684329 | 10684329  | C | T | 0.9549 | 1.1499  | 0.2735 | 3.99E-05 |
| 2  | rs11896392  | 222543983 | C | G | 0.9076 | 0.7598  | 0.1807 | 3.99E-05 |
| 15 | 15-74052315 | 74052315  | C | G | 0.9866 | 2.3402  | 0.5568 | 4.00E-05 |
| 6  | rs72998647  | 155992055 | T | C | 0.5813 | 0.473   | 0.1126 | 4.01E-05 |
| 5  | rs78055167  | 28338398  | G | C | 0.9715 | 1.4205  | 0.3381 | 4.02E-05 |
| 6  | rs9368470   | 10903850  | G | A | 0.7195 | -0.5374 | 0.1279 | 4.02E-05 |
| 15 | 15-74061427 | 74061427  | G | A | 0.9866 | 2.3389  | 0.5567 | 4.03E-05 |
| 11 | rs2746547   | 33570128  | T | C | 0.3266 | -0.4511 | 0.1074 | 4.04E-05 |

|    |             |           |   |   |        |         |        |          |
|----|-------------|-----------|---|---|--------|---------|--------|----------|
| 10 | rs28411919  | 55174567  | A | G | 0.8843 | 0.7445  | 0.1773 | 4.06E-05 |
| 1  | rs79161001  | 106079701 | A | G | 0.9057 | 0.7771  | 0.1852 | 4.11E-05 |
| 5  | rs32719     | 165297797 | C | T | 0.9397 | 1.0102  | 0.2408 | 4.12E-05 |
| 9  | rs73534897  | 97977435  | T | C | 0.9336 | -1.0053 | 0.2396 | 4.13E-05 |
| 6  | rs2201886   | 155999177 | G | A | 0.5866 | 0.4732  | 0.1128 | 4.14E-05 |
| 13 | rs61961105  | 113331555 | T | C | 0.8569 | 0.6143  | 0.1465 | 4.16E-05 |
| 12 | 12-33796050 | 33796050  | A | G | 0.9859 | 2.0752  | 0.4949 | 4.16E-05 |
| 13 | rs118013076 | 63490491  | C | A | 0.9894 | 2.5592  | 0.6105 | 4.18E-05 |
| 1  | rs1606971   | 106078007 | C | A | 0.9057 | 0.7776  | 0.1855 | 4.19E-05 |
| 1  | rs1165287   | 55520212  | G | A | 0.3231 | -0.5173 | 0.1234 | 4.19E-05 |
| 1  | rs11184605  | 106078805 | A | G | 0.9055 | 0.7745  | 0.1848 | 4.20E-05 |
| 1  | rs1606970   | 106078030 | G | C | 0.9055 | 0.7745  | 0.1848 | 4.20E-05 |
| 13 | rs79544445  | 113331552 | G | T | 0.8568 | 0.614   | 0.1465 | 4.21E-05 |
| 1  | rs1851792   | 106073570 | C | T | 0.9056 | 0.7743  | 0.1848 | 4.23E-05 |
| 1  | rs1710790   | 106072410 | A | G | 0.9056 | 0.7742  | 0.1848 | 4.23E-05 |
| 13 | rs387139    | 32683100  | G | A | 0.4115 | -0.4671 | 0.1115 | 4.24E-05 |
| 6  | rs12193199  | 138352181 | G | A | 0.9833 | 2.0653  | 0.4931 | 4.25E-05 |
| 18 | rs9961696   | 25869172  | T | C | 0.4728 | 0.4631  | 0.1106 | 4.25E-05 |
| 18 | rs668798    | 8400866   | G | A | 0.5322 | 0.458   | 0.1094 | 4.25E-05 |
| 1  | rs2090336   | 106068107 | A | T | 0.9058 | 0.774   | 0.1849 | 4.26E-05 |
| 11 | rs2076623   | 33564123  | T | C | 0.3267 | -0.4491 | 0.1073 | 4.28E-05 |
| 1  | rs2501596   | 106066693 | T | G | 0.9059 | 0.7739  | 0.1849 | 4.28E-05 |
| 1  | 1-106366175 | 106366175 | C | A | 0.9893 | 2.5179  | 0.6015 | 4.29E-05 |
| 10 | rs71478888  | 71038431  | C | T | 0.9803 | 1.8255  | 0.4361 | 4.29E-05 |
| 1  | rs1721542   | 106066105 | T | A | 0.9059 | 0.7738  | 0.1849 | 4.29E-05 |
| 1  | rs777095    | 106063610 | G | A | 0.9059 | 0.7738  | 0.1849 | 4.30E-05 |
| 1  | rs777099    | 106056576 | G | A | 0.9059 | 0.7738  | 0.1849 | 4.30E-05 |
| 1  | rs777102    | 106054543 | G | T | 0.9059 | 0.7738  | 0.1849 | 4.30E-05 |
| 1  | rs1400100   | 106053322 | G | A | 0.9059 | 0.7738  | 0.1849 | 4.30E-05 |
| 1  | rs1710772   | 106058864 | G | A | 0.9059 | 0.7738  | 0.1849 | 4.30E-05 |
| 1  | rs1721531   | 106045217 | G | A | 0.9059 | 0.7738  | 0.1849 | 4.30E-05 |
| 1  | rs1721533   | 106043860 | T | A | 0.9059 | 0.7738  | 0.1849 | 4.30E-05 |
| 1  | rs2255422   | 106052011 | T | C | 0.9059 | 0.7738  | 0.1849 | 4.30E-05 |
| 1  | rs2459318   | 106048663 | T | C | 0.9059 | 0.7738  | 0.1849 | 4.30E-05 |
| 1  | rs2501598   | 106038410 | T | G | 0.9059 | 0.7738  | 0.1849 | 4.30E-05 |
| 1  | rs6695016   | 106040066 | C | T | 0.9059 | 0.7738  | 0.1849 | 4.30E-05 |
| 1  | rs11184597  | 106064241 | C | G | 0.9059 | 0.7738  | 0.1849 | 4.30E-05 |
| 1  | rs12023854  | 106064845 | C | A | 0.9059 | 0.7738  | 0.1849 | 4.30E-05 |
| 1  | rs12037064  | 106048945 | A | T | 0.9059 | 0.7738  | 0.1849 | 4.30E-05 |
| 1  | rs12045534  | 106064926 | G | A | 0.9059 | 0.7738  | 0.1849 | 4.30E-05 |
| 1  | rs12090701  | 106046094 | C | T | 0.9059 | 0.7738  | 0.1849 | 4.30E-05 |

|    |             |           |   |   |        |         |        |          |
|----|-------------|-----------|---|---|--------|---------|--------|----------|
| 1  | rs72690944  | 106034336 | A | T | 0.9059 | 0.7738  | 0.1849 | 4.30E-05 |
| 1  | rs114176247 | 106036218 | T | A | 0.9059 | 0.7738  | 0.1849 | 4.30E-05 |
| 6  | rs485387    | 96443078  | G | T | 0.5589 | -0.484  | 0.1157 | 4.31E-05 |
| 3  | rs13087567  | 164367639 | C | T | 0.8776 | -0.6829 | 0.1632 | 4.32E-05 |
| 3  | rs4065409   | 1328206   | T | C | 0.9656 | 1.459   | 0.3489 | 4.35E-05 |
| 2  | rs11682490  | 222532318 | T | C | 0.9084 | 0.7575  | 0.1812 | 4.37E-05 |
| 11 | rs74747409  | 96631712  | G | C | 0.9549 | 1.1823  | 0.2828 | 4.37E-05 |
| 20 | rs17445007  | 8633289   | G | A | 0.9676 | 1.4478  | 0.3463 | 4.38E-05 |
| 13 | rs7998202   | 113331868 | A | G | 0.8564 | 0.6112  | 0.1462 | 4.39E-05 |
| 13 | rs35549742  | 113331845 | C | T | 0.8564 | 0.6112  | 0.1462 | 4.39E-05 |
| 13 | rs61961106  | 113331650 | G | A | 0.8564 | 0.6112  | 0.1462 | 4.39E-05 |
| 16 | rs56130044  | 66396320  | C | A | 0.71   | 0.5001  | 0.1197 | 4.39E-05 |
| 13 | rs7329407   | 113331288 | G | A | 0.8564 | 0.6112  | 0.1462 | 4.39E-05 |
| 13 | rs61961104  | 113330683 | A | G | 0.8564 | 0.6112  | 0.1462 | 4.39E-05 |
| 13 | rs34513879  | 113330487 | G | C | 0.8564 | 0.6112  | 0.1462 | 4.39E-05 |
| 13 | rs12868291  | 113329598 | T | C | 0.8564 | 0.6112  | 0.1462 | 4.40E-05 |
| 13 | rs12874782  | 113329764 | C | T | 0.8564 | 0.6112  | 0.1462 | 4.40E-05 |
| 13 | rs34204254  | 113330138 | A | G | 0.8564 | 0.6112  | 0.1462 | 4.40E-05 |
| 13 | rs55802731  | 113330229 | A | G | 0.8564 | 0.6112  | 0.1462 | 4.40E-05 |
| 13 | rs61961108  | 113333313 | G | C | 0.8566 | 0.6182  | 0.1479 | 4.41E-05 |
| 13 | rs59976799  | 113331553 | A | C | 0.8564 | 0.6109  | 0.1463 | 4.44E-05 |
| 13 | rs7987592   | 113330752 | G | A | 0.8564 | 0.6109  | 0.1463 | 4.44E-05 |
| 13 | rs7990867   | 113329754 | T | C | 0.8564 | 0.6109  | 0.1463 | 4.45E-05 |
| 18 | rs1319637   | 53207325  | A | G | 0.7964 | 0.5518  | 0.1321 | 4.45E-05 |
| 18 | rs17513240  | 53208982  | A | T | 0.7964 | 0.5517  | 0.1321 | 4.46E-05 |
| 2  | rs113977084 | 893877    | T | C | 0.8401 | 0.6818  | 0.1634 | 4.51E-05 |
| 22 | 22-32410307 | 32410307  | G | A | 0.9812 | 1.7517  | 0.4198 | 4.52E-05 |
| 1  | rs479910    | 55522141  | A | G | 0.3155 | -0.5101 | 0.1223 | 4.53E-05 |
| 2  | rs540006    | 70783422  | T | C | 0.9053 | 0.8585  | 0.2058 | 4.53E-05 |
| 5  | 5-51841770  | 51841770  | A | G | 0.917  | -0.9065 | 0.2173 | 4.54E-05 |
| 18 | rs79859436  | 68357809  | T | A | 0.9864 | 2.1524  | 0.5162 | 4.57E-05 |
| 10 | rs11003615  | 55168821  | A | C | 0.8852 | 0.7313  | 0.1754 | 4.61E-05 |
| 16 | rs7198579   | 66379653  | A | C | 0.5969 | 0.4658  | 0.1118 | 4.65E-05 |
| 12 | rs11107236  | 94282093  | C | A | 0.4579 | 0.4845  | 0.1163 | 4.68E-05 |
| 10 | rs11815126  | 122467490 | T | C | 0.9641 | 1.2673  | 0.3045 | 4.72E-05 |
| 15 | rs76563152  | 46011917  | A | G | 0.977  | 1.5618  | 0.3753 | 4.73E-05 |
| 18 | rs732445    | 51122357  | T | G | 0.9233 | 0.8096  | 0.1946 | 4.76E-05 |
| 18 | rs8087303   | 51128424  | A | T | 0.9233 | 0.8096  | 0.1946 | 4.76E-05 |
| 18 | rs76034526  | 51129527  | C | T | 0.9233 | 0.8096  | 0.1946 | 4.76E-05 |
| 5  | 5-81149994  | 81149994  | T | A | 0.9878 | 2.1183  | 0.5093 | 4.78E-05 |
| 4  | rs1965937   | 156513293 | G | A | 0.0199 | -1.6409 | 0.3949 | 4.86E-05 |



|    |             |          |   |   |        |        |        |          |
|----|-------------|----------|---|---|--------|--------|--------|----------|
| 22 | 22-32544080 | 32544080 | G | A | 0.9815 | 1.7386 | 0.4186 | 4.89E-05 |
| 5  | rs2329738   | 28334873 | C | T | 0.9711 | 1.4008 | 0.3375 | 4.94E-05 |
| 18 | 18-22542322 | 22542322 | C | T | 0.9878 | 2.2496 | 0.5422 | 4.97E-05 |
| 11 | 11-96644304 | 96644304 | T | C | 0.9577 | 1.2574 | 0.3031 | 4.98E-05 |

**Legend:** ICH: intracerebral hemorrhage; SE: standard error; A1: allele testes; A2: reference

allele; SNP: single nucleotide polymorphism; CHR: chromosome; BP: base pair; FRQ: A1 allele

frequency; OR: odd ratio

**Supplemental Table II. SNPs with  $p < 5 \times 10^{-5}$  for non-lobar ICH.**

| CHR | SNP         | BP        | A1 | A2 | FRQ    | BETA    | SE     | P        |
|-----|-------------|-----------|----|----|--------|---------|--------|----------|
| 17  | rs11655160  | 10893070  | G  | A  | 0.7622 | 0.9532  | 0.1656 | 4.33E-08 |
| 17  | rs11650930  | 10893094  | A  | G  | 0.7621 | 0.953   | 0.1656 | 4.36E-08 |
| 6   | rs12199504  | 166037862 | C  | T  | 0.7601 | 0.8819  | 0.1654 | 3.31E-07 |
| 6   | rs2983503   | 166035415 | G  | A  | 0.761  | 0.8832  | 0.1661 | 3.55E-07 |
| 6   | rs10946087  | 166034369 | T  | C  | 0.7607 | 0.8809  | 0.1659 | 3.68E-07 |
| 6   | rs10946088  | 166034379 | T  | C  | 0.7607 | 0.8809  | 0.1659 | 3.68E-07 |
| 6   | rs3008015   | 166029018 | A  | G  | 0.7591 | 0.8784  | 0.1664 | 4.21E-07 |
| 6   | rs3008016   | 166029906 | C  | T  | 0.7591 | 0.8784  | 0.1664 | 4.21E-07 |
| 6   | rs12205959  | 166029608 | G  | A  | 0.7591 | 0.8784  | 0.1664 | 4.21E-07 |
| 6   | rs3008018   | 166030770 | A  | G  | 0.7591 | 0.8784  | 0.1664 | 4.22E-07 |
| 6   | rs3008019   | 166031097 | G  | T  | 0.7592 | 0.8787  | 0.1664 | 4.23E-07 |
| 6   | rs2983506   | 166038032 | T  | A  | 0.757  | 0.8637  | 0.1641 | 4.55E-07 |
| 6   | rs62424869  | 166033360 | T  | C  | 0.7615 | 0.8759  | 0.1667 | 4.73E-07 |
| 6   | rs3008030   | 166037467 | T  | C  | 0.7582 | 0.8614  | 0.1652 | 5.73E-07 |
| 6   | rs2983498   | 166032185 | T  | A  | 0.7621 | 0.8705  | 0.1671 | 5.86E-07 |
| 6   | rs12190595  | 166019083 | A  | G  | 0.765  | 0.882   | 0.1703 | 6.69E-07 |
| 10  | rs10762437  | 73058469  | A  | G  | 0.8103 | 0.9779  | 0.1894 | 7.20E-07 |
| 10  | rs10823721  | 73058558  | A  | G  | 0.8105 | 0.9778  | 0.1894 | 7.21E-07 |
| 6   | rs1095895   | 166023100 | C  | T  | 0.7589 | 0.8642  | 0.1675 | 7.36E-07 |
| 6   | rs828568    | 166020244 | A  | G  | 0.7611 | 0.8577  | 0.1677 | 8.96E-07 |
| 6   | rs828567    | 166020176 | T  | C  | 0.7613 | 0.8551  | 0.1677 | 9.73E-07 |
| 17  | rs9303267   | 10893000  | T  | C  | 0.7113 | 0.8258  | 0.1628 | 1.09E-06 |
| 6   | rs828566    | 166018454 | C  | T  | 0.7619 | 0.8447  | 0.1679 | 1.32E-06 |
| 6   | rs705789    | 166018290 | A  | C  | 0.7622 | 0.8404  | 0.168  | 1.49E-06 |
| 10  | rs12416666  | 81627277  | C  | T  | 0.9028 | 1.1882  | 0.2438 | 2.66E-06 |
| 7   | rs12702060  | 43779415  | C  | G  | 0.9469 | 1.7361  | 0.3582 | 2.98E-06 |
| 10  | rs11596967  | 73029647  | T  | C  | 0.9571 | 1.8055  | 0.3744 | 3.31E-06 |
| 10  | rs78444107  | 24711783  | G  | C  | 0.9203 | -1.3448 | 0.28   | 3.61E-06 |
| 10  | rs16916256  | 24707343  | A  | C  | 0.9207 | -1.3431 | 0.28   | 3.70E-06 |
| 6   | rs7739832   | 37615199  | A  | G  | 0.9567 | 1.6378  | 0.3416 | 3.73E-06 |
| 10  | rs16916248  | 24706515  | T  | G  | 0.9207 | -1.3426 | 0.28   | 3.74E-06 |
| 8   | rs6578215   | 142734763 | A  | G  | 0.3239 | 0.7476  | 0.1561 | 3.84E-06 |
| 6   | rs804858    | 37613592  | G  | A  | 0.9572 | 1.6428  | 0.3435 | 3.95E-06 |
| 6   | rs804857    | 37612626  | C  | T  | 0.9574 | 1.6437  | 0.3445 | 4.12E-06 |
| 8   | rs1478282   | 4490337   | C  | G  | 0.1895 | -0.8729 | 0.1844 | 4.87E-06 |
| 8   | rs2617007   | 4494811   | T  | G  | 0.193  | -0.8714 | 0.1841 | 4.89E-06 |
| 3   | rs9821478   | 136310985 | C  | G  | 0.9299 | -1.2382 | 0.2628 | 5.35E-06 |
| 6   | rs804832    | 37610191  | G  | A  | 0.9598 | 1.7115  | 0.3642 | 5.65E-06 |
| 6   | rs804833    | 37610210  | A  | T  | 0.9598 | 1.7119  | 0.3645 | 5.70E-06 |
| 10  | rs10999755  | 73025342  | T  | C  | 0.9582 | 1.8054  | 0.3852 | 5.96E-06 |
| 5   | rs11748865  | 98568241  | T  | C  | 0.7628 | 0.7902  | 0.1686 | 5.97E-06 |
| 8   | rs2724973   | 4493912   | A  | C  | 0.1665 | -0.9455 | 0.2018 | 5.99E-06 |
| 17  | rs4792075   | 10899694  | T  | C  | 0.7866 | 0.8318  | 0.1776 | 6.03E-06 |
| 8   | rs2616990   | 4486321   | C  | G  | 0.1885 | -0.864  | 0.1846 | 6.10E-06 |
| 10  | rs117083365 | 73035997  | T  | C  | 0.9666 | 1.8851  | 0.4031 | 6.21E-06 |
| 8   | rs1382257   | 4486617   | G  | C  | 0.187  | -0.8665 | 0.186  | 6.73E-06 |
| 8   | rs11136759  | 4490887   | C  | G  | 0.1641 | -0.9328 | 0.2005 | 6.90E-06 |
| 5   | rs1073601   | 98566596  | A  | G  | 0.7611 | 0.7823  | 0.1684 | 7.13E-06 |
| 8   | 8-4692454   | 4692454   | G  | A  | 0.978  | 2.3222  | 0.5015 | 7.56E-06 |
| 5   | rs2078442   | 98566963  | C  | T  | 0.7605 | 0.7815  | 0.169  | 7.73E-06 |
| 16  | rs1362592   | 48930717  | A  | G  | 0.5438 | -0.6407 | 0.1395 | 8.90E-06 |
| 8   | rs79984512  | 4681353   | G  | A  | 0.9749 | 2.1424  | 0.4674 | 9.25E-06 |
| 8   | rs11785217  | 4679469   | C  | G  | 0.975  | 2.1395  | 0.4675 | 9.51E-06 |

|    |             |           |   |   |        |         |        |          |
|----|-------------|-----------|---|---|--------|---------|--------|----------|
| 8  | rs11779619  | 4685925   | G | C | 0.978  | 2.2793  | 0.4982 | 9.58E-06 |
| 5  | rs17086689  | 96108701  | T | C | 0.8817 | 1.0239  | 0.224  | 9.77E-06 |
| 10 | rs16924741  | 24713465  | T | G | 0.9299 | -1.3392 | 0.2935 | 1.01E-05 |
| 10 | rs4626966   | 24713564  | C | T | 0.9298 | -1.339  | 0.2936 | 1.02E-05 |
| 3  | rs9289511   | 136262364 | T | C | 0.9323 | -1.2182 | 0.2672 | 1.02E-05 |
| 10 | rs12411459  | 24714335  | T | A | 0.9299 | -1.3413 | 0.2945 | 1.05E-05 |
| 17 | rs11651428  | 10897280  | C | T | 0.7857 | 0.8101  | 0.1779 | 1.05E-05 |
| 3  | rs9820485   | 136228566 | A | C | 0.9317 | -1.2118 | 0.2665 | 1.08E-05 |
| 4  | rs17713750  | 4721464   | C | T | 0.9597 | 1.9711  | 0.4347 | 1.14E-05 |
| 7  | 7-41211385  | 41211385  | C | A | 0.9854 | 2.9808  | 0.6586 | 1.18E-05 |
| 3  | rs9849696   | 136186756 | G | C | 0.931  | -1.1987 | 0.2658 | 1.26E-05 |
| 1  | 1-101785364 | 101785364 | C | T | 0.9872 | 3.184   | 0.7061 | 1.26E-05 |
| 8  | rs2061749   | 4482200   | A | G | 0.1683 | -0.8658 | 0.1923 | 1.30E-05 |
| 8  | rs73179662  | 4652298   | G | A | 0.9465 | 1.5228  | 0.3384 | 1.31E-05 |
| 17 | rs758113    | 10898743  | A | G | 0.7843 | 0.7933  | 0.1764 | 1.33E-05 |
| 10 | rs61861056  | 81342290  | T | C | 0.8508 | 0.956   | 0.2127 | 1.34E-05 |
| 5  | 5-28629810  | 28629810  | G | C | 0.9887 | 3.4938  | 0.7801 | 1.43E-05 |
| 7  | rs75474297  | 37973124  | T | A | 0.8932 | 1.1091  | 0.2476 | 1.43E-05 |
| 7  | rs75207237  | 37972390  | T | A | 0.8932 | 1.1085  | 0.2479 | 1.48E-05 |
| 10 | rs111823183 | 99017869  | C | T | 0.952  | 1.6554  | 0.3703 | 1.48E-05 |
| 20 | rs62185664  | 10945743  | C | T | 0.9328 | 1.3919  | 0.3114 | 1.49E-05 |
| 19 | rs2866971   | 30972962  | T | A | 0.8947 | 1.0478  | 0.2349 | 1.55E-05 |
| 4  | rs7690621   | 108381588 | G | A | 0.574  | -0.6213 | 0.1394 | 1.58E-05 |
| 6  | rs59148743  | 166038536 | T | C | 0.687  | 0.7083  | 0.1594 | 1.65E-05 |
| 10 | rs10509332  | 73051440  | G | A | 0.9633 | 1.7382  | 0.3916 | 1.69E-05 |
| 10 | 10-81820937 | 81820937  | C | G | 0.9084 | 1.0778  | 0.2429 | 1.70E-05 |
| 4  | rs13147139  | 111611160 | A | G | 0.3685 | -0.666  | 0.1503 | 1.74E-05 |
| 3  | 3-136090808 | 136090808 | T | C | 0.9299 | -1.1675 | 0.2636 | 1.76E-05 |
| 10 | rs13376755  | 73044739  | C | T | 0.9633 | 1.7315  | 0.3911 | 1.77E-05 |
| 17 | rs9890278   | 47073949  | T | C | 0.4444 | -0.6495 | 0.1468 | 1.79E-05 |
| 17 | rs8067392   | 47055949  | C | A | 0.469  | -0.639  | 0.1444 | 1.79E-05 |
| 10 | rs6602191   | 6811405   | G | T | 0.8969 | 1.1304  | 0.2556 | 1.81E-05 |
| 13 | rs7999437   | 51716211  | G | A | 0.8768 | 1.0051  | 0.2273 | 1.82E-05 |
| 8  | rs7465497   | 142730679 | A | C | 0.333  | 0.6993  | 0.1582 | 1.82E-05 |
| 7  | rs2239956   | 116949286 | C | T | 0.5701 | -0.6236 | 0.1412 | 1.85E-05 |
| 4  | rs7692422   | 108457327 | C | T | 0.3938 | 0.6145  | 0.1391 | 1.85E-05 |
| 9  | rs115195139 | 9042390   | G | A | 0.9601 | 1.6673  | 0.3777 | 1.87E-05 |
| 4  | rs1913586   | 108455221 | T | C | 0.3945 | 0.613   | 0.139  | 1.90E-05 |
| 14 | rs4901536   | 55200534  | T | C | 0.3018 | 0.6618  | 0.1501 | 1.92E-05 |
| 5  | rs71586447  | 119241132 | T | G | 0.9057 | 1.0717  | 0.2435 | 1.97E-05 |
| 9  | rs115040653 | 9044668   | C | A | 0.9603 | 1.6605  | 0.3775 | 1.99E-05 |
| 9  | rs12003416  | 9043566   | G | C | 0.9603 | 1.6603  | 0.3775 | 2.00E-05 |
| 9  | rs1328305   | 97055376  | G | A | 0.9763 | 2.0985  | 0.4773 | 2.01E-05 |
| 10 | rs4253521   | 81372712  | G | T | 0.1494 | -1.0404 | 0.2367 | 2.02E-05 |
| 3  | rs62251282  | 63212375  | A | G | 0.95   | 1.73    | 0.3938 | 2.04E-05 |
| 8  | rs4875373   | 4498109   | G | T | 0.265  | -0.7256 | 0.1652 | 2.06E-05 |
| 5  | 5-123512271 | 123512271 | A | T | 0.8333 | 0.8866  | 0.2019 | 2.06E-05 |
| 8  | rs1382256   | 4486446   | A | T | 0.2727 | -0.7017 | 0.1599 | 2.07E-05 |
| 10 | rs10823712  | 73023188  | C | T | 0.9685 | 1.8963  | 0.4323 | 2.10E-05 |
| 8  | rs2724970   | 4492663   | T | C | 0.178  | -0.8498 | 0.1938 | 2.10E-05 |
| 16 | rs2355648   | 48928972  | T | G | 0.5396 | -0.6176 | 0.1408 | 2.10E-05 |
| 8  | rs2447696   | 4489351   | C | G | 0.1768 | -0.8379 | 0.1913 | 2.16E-05 |
| 8  | rs2725083   | 4490109   | A | G | 0.1768 | -0.8379 | 0.1913 | 2.16E-05 |
| 4  | rs2218697   | 111617753 | G | A | 0.324  | -0.6697 | 0.153  | 2.17E-05 |
| 8  | rs10111342  | 142730519 | T | C | 0.3118 | 0.6928  | 0.1582 | 2.17E-05 |
| 8  | rs1478278   | 4485248   | T | C | 0.1707 | -0.8421 | 0.1925 | 2.20E-05 |

|    |             |           |   |   |        |         |        |          |
|----|-------------|-----------|---|---|--------|---------|--------|----------|
| 9  | 9-9058485   | 9058485   | G | C | 0.9613 | 1.7399  | 0.3981 | 2.23E-05 |
| 10 | rs11253648  | 6656367   | C | A | 0.7622 | -0.7786 | 0.1781 | 2.24E-05 |
| 10 | rs17881607  | 81322280  | C | A | 0.9082 | 1.1597  | 0.2656 | 2.27E-05 |
| 14 | rs10132489  | 96656687  | C | A | 0.4975 | 0.6403  | 0.1466 | 2.27E-05 |
| 17 | rs1390154   | 47071483  | A | G | 0.442  | -0.6377 | 0.1461 | 2.29E-05 |
| 9  | rs4526454   | 27640501  | G | A | 0.7053 | -0.7525 | 0.1731 | 2.45E-05 |
| 1  | rs12144578  | 232304195 | G | C | 0.5487 | 0.6296  | 0.1449 | 2.47E-05 |
| 17 | rs76045475  | 51758879  | T | C | 0.9462 | 1.498   | 0.3454 | 2.56E-05 |
| 3  | rs9879787   | 136255557 | A | C | 0.9447 | -1.3556 | 0.3127 | 2.59E-05 |
| 20 | rs6031466   | 42848997  | C | T | 0.7989 | 0.7708  | 0.1779 | 2.62E-05 |
| 9  | rs73430116  | 9034610   | C | T | 0.9577 | 1.6158  | 0.373  | 2.62E-05 |
| 10 | rs11598330  | 73034953  | G | T | 0.9085 | 1.1445  | 0.2643 | 2.64E-05 |
| 6  | rs1033698   | 166025977 | C | T | 0.5519 | -0.6218 | 0.1438 | 2.71E-05 |
| 20 | rs6130568   | 42834765  | C | T | 0.907  | 1.0341  | 0.2398 | 2.83E-05 |
| 12 | rs2417292   | 13726201  | T | C | 0.0148 | -2.7566 | 0.6397 | 2.87E-05 |
| 10 | rs61860960  | 81318310  | C | T | 0.8608 | 0.9128  | 0.2119 | 2.89E-05 |
| 8  | rs7838310   | 142735045 | T | C | 0.3631 | 0.6771  | 0.1573 | 2.91E-05 |
| 6  | rs6899706   | 12563462  | T | G | 0.9264 | 1.2952  | 0.3009 | 2.92E-05 |
| 20 | rs6085659   | 6686426   | A | G | 0.6098 | 0.5942  | 0.1382 | 2.98E-05 |
| 17 | rs16972184  | 77232917  | T | C | 0.9876 | 3.1456  | 0.7318 | 3.00E-05 |
| 2  | rs17270248  | 169966512 | C | T | 0.9482 | 1.4127  | 0.3287 | 3.01E-05 |
| 17 | rs73414026  | 77232469  | C | T | 0.9876 | 3.1429  | 0.7319 | 3.05E-05 |
| 1  | rs783044    | 66851452  | C | A | 0.7012 | 0.7051  | 0.1642 | 3.06E-05 |
| 12 | rs11044461  | 19400174  | A | G | 0.3022 | -0.6421 | 0.1497 | 3.10E-05 |
| 10 | 10-81372796 | 81372796  | T | C | 0.9044 | 1.0902  | 0.2544 | 3.16E-05 |
| 10 | rs16924739  | 24712864  | T | C | 0.9177 | -1.1259 | 0.2629 | 3.20E-05 |
| 8  | rs505775    | 8628950   | C | T | 0.9214 | -1.1757 | 0.2747 | 3.22E-05 |
| 8  | rs2617009   | 4496463   | T | C | 0.2256 | -0.7562 | 0.1767 | 3.25E-05 |
| 6  | rs1523985   | 124632761 | G | A | 0.8195 | -0.7762 | 0.1815 | 3.27E-05 |
| 1  | rs75239393  | 112546883 | C | T | 0.9725 | 1.8828  | 0.4403 | 3.28E-05 |
| 10 | rs10999754  | 73025201  | C | T | 0.9641 | 1.7354  | 0.4059 | 3.29E-05 |
| 8  | rs2725007   | 4500036   | C | T | 0.3659 | -0.6369 | 0.149  | 3.29E-05 |
| 8  | rs779106    | 4119469   | A | G | 0.1341 | -0.9121 | 0.2135 | 3.35E-05 |
| 15 | 15-53541435 | 53541435  | A | G | 0.9808 | 2.3133  | 0.5416 | 3.35E-05 |
| 20 | rs6133312   | 6398192   | C | T | 0.6684 | 0.6704  | 0.157  | 3.38E-05 |
| 8  | rs905765    | 4109415   | G | C | 0.8811 | 1.0076  | 0.2361 | 3.40E-05 |
| 8  | rs6578214   | 142729675 | A | C | 0.3095 | 0.6747  | 0.1582 | 3.43E-05 |
| 4  | rs10939212  | 11232356  | A | T | 0.4761 | -0.5946 | 0.1394 | 3.44E-05 |
| 14 | rs2359360   | 55199776  | C | T | 0.3137 | 0.637   | 0.1494 | 3.45E-05 |
| 20 | rs1998970   | 6399890   | T | G | 0.6681 | 0.6694  | 0.157  | 3.45E-05 |
| 10 | rs4253484   | 81366548  | G | A | 0.2347 | -0.8223 | 0.1932 | 3.55E-05 |
| 18 | 18-57820725 | 57820725  | T | C | 0.9837 | 2.4993  | 0.5876 | 3.59E-05 |
| 20 | rs6085534   | 6377183   | C | T | 0.6686 | 0.6709  | 0.1579 | 3.68E-05 |
| 20 | rs12625146  | 6377629   | T | G | 0.6686 | 0.6709  | 0.1579 | 3.68E-05 |
| 4  | rs77235745  | 111609142 | C | T | 0.3925 | -0.6724 | 0.1584 | 3.71E-05 |
| 4  | rs2595112   | 111605764 | G | C | 0.3054 | -0.6547 | 0.1544 | 3.79E-05 |
| 20 | rs6038478   | 6381666   | C | G | 0.6679 | 0.6702  | 0.1581 | 3.81E-05 |
| 12 | rs1835321   | 19398408  | C | T | 0.3002 | -0.6407 | 0.1512 | 3.83E-05 |
| 17 | rs9916512   | 10892295  | A | G | 0.6634 | 0.6811  | 0.1607 | 3.83E-05 |
| 17 | rs74820687  | 51764831  | C | T | 0.9482 | 1.476   | 0.3484 | 3.85E-05 |
| 17 | rs9916563   | 10892366  | A | G | 0.6633 | 0.6806  | 0.1607 | 3.86E-05 |
| 1  | rs7512037   | 221778964 | A | T | 0.807  | 0.8386  | 0.198  | 3.87E-05 |
| 17 | rs9916827   | 10892473  | A | G | 0.6631 | 0.6799  | 0.1606 | 3.89E-05 |
| 20 | rs11087729  | 6381955   | G | C | 0.6674 | 0.6696  | 0.1582 | 3.91E-05 |
| 1  | rs11122437  | 232301835 | C | T | 0.5518 | 0.6184  | 0.1463 | 3.97E-05 |
| 20 | rs6085658   | 6685377   | C | T | 0.6119 | 0.6051  | 0.1431 | 3.99E-05 |

|    |             |           |   |   |        |         |        |          |
|----|-------------|-----------|---|---|--------|---------|--------|----------|
| 8  | rs35167032  | 83931711  | T | C | 0.8861 | 1.009   | 0.2389 | 4.03E-05 |
| 15 | rs3921827   | 53553685  | T | C | 0.0287 | -1.8564 | 0.4394 | 4.04E-05 |
| 12 | rs10082906  | 19509905  | A | T | 0.2763 | -0.6461 | 0.153  | 4.04E-05 |
| 2  | rs56069956  | 169926566 | G | A | 0.8268 | 0.7722  | 0.1833 | 4.21E-05 |
| 11 | rs11026011  | 3245134   | G | A | 0.6401 | -0.6548 | 0.1555 | 4.27E-05 |
| 8  | rs905764    | 4109332   | C | G | 0.8843 | 1.0054  | 0.239  | 4.34E-05 |
| 17 | rs4794013   | 47065288  | G | A | 0.4451 | -0.6151 | 0.1464 | 4.41E-05 |
| 17 | rs4794012   | 47065091  | G | T | 0.4451 | -0.615  | 0.1464 | 4.42E-05 |
| 17 | rs76805222  | 51877423  | C | T | 0.9247 | 1.2254  | 0.2917 | 4.42E-05 |
| 21 | 21-20243319 | 20243319  | G | A | 0.9594 | 1.6046  | 0.3821 | 4.45E-05 |
| 15 | rs1486569   | 53555303  | G | A | 0.0287 | -1.8424 | 0.4389 | 4.49E-05 |
| 10 | rs56187953  | 81434787  | A | C | 0.9169 | 1.1233  | 0.2676 | 4.49E-05 |
| 4  | rs11729642  | 108420369 | C | T | 0.6073 | -0.5791 | 0.138  | 4.51E-05 |
| 6  | rs537112    | 10395206  | C | T | 0.9299 | 1.2189  | 0.2905 | 4.53E-05 |
| 14 | rs2359361   | 55199830  | T | A | 0.3077 | 0.634   | 0.1511 | 4.54E-05 |
| 10 | rs2420681   | 122030181 | C | T | 0.6739 | -0.6828 | 0.1629 | 4.60E-05 |
| 15 | rs10851537  | 53555661  | T | C | 0.0287 | -1.8388 | 0.4388 | 4.61E-05 |
| 12 | rs77711730  | 29874722  | T | C | 0.9444 | 1.2942  | 0.3088 | 4.62E-05 |
| 4  | rs7669850   | 108443243 | C | T | 0.6052 | -0.5798 | 0.1384 | 4.63E-05 |
| 8  | rs2656285   | 4117538   | T | C | 0.3049 | -0.6472 | 0.1545 | 4.65E-05 |
| 12 | rs2417772   | 19350193  | C | T | 0.2866 | -0.637  | 0.1521 | 4.69E-05 |
| 12 | rs10770454  | 19394160  | G | A | 0.2985 | -0.6372 | 0.1522 | 4.71E-05 |
| 5  | rs114127854 | 97952159  | T | G | 0.9826 | 2.4308  | 0.5808 | 4.72E-05 |
| 4  | 4-111614076 | 111614076 | C | T | 0.3071 | -0.6247 | 0.1493 | 4.72E-05 |
| 2  | rs16856430  | 169923927 | G | A | 0.8276 | 0.7806  | 0.1866 | 4.74E-05 |
| 8  | rs10504776  | 83991660  | G | A | 0.9024 | 1.044   | 0.2496 | 4.76E-05 |
| 8  | rs11777482  | 83993381  | G | A | 0.9025 | 1.0449  | 0.2498 | 4.77E-05 |
| 8  | rs6983521   | 4109064   | G | C | 0.8849 | 1.0029  | 0.2398 | 4.77E-05 |
| 8  | rs1478280   | 4487278   | G | T | 0.2774 | -0.6707 | 0.1604 | 4.80E-05 |
| 8  | rs659256    | 8625041   | A | G | 0.9146 | -1.0848 | 0.2595 | 4.82E-05 |
| 4  | rs62312429  | 108424102 | C | G | 0.6057 | -0.5775 | 0.1382 | 4.85E-05 |
| 14 | rs2359362   | 55199959  | C | T | 0.3079 | 0.6309  | 0.151  | 4.85E-05 |
| 10 | rs3895291   | 81626662  | T | C | 0.8657 | 0.8743  | 0.2094 | 4.91E-05 |
| 10 | 10-81626617 | 81626617  | T | C | 0.8657 | 0.8742  | 0.2094 | 4.92E-05 |
| 4  | rs6858279   | 108419494 | T | C | 0.6079 | -0.5759 | 0.138  | 4.92E-05 |
| 5  | rs11748795  | 96168056  | G | T | 0.8689 | 0.8795  | 0.2107 | 4.93E-05 |
| 4  | rs72667953  | 111620109 | G | A | 0.7014 | 0.6348  | 0.1521 | 4.96E-05 |
| 4  | rs1579946   | 111620120 | C | T | 0.7014 | 0.6348  | 0.1521 | 4.96E-05 |
| 5  | rs11742261  | 96167608  | C | T | 0.8689 | 0.8795  | 0.2108 | 4.96E-05 |
| 17 | rs56076360  | 18325051  | C | G | 0.6727 | 0.6876  | 0.1648 | 4.97E-05 |
| 13 | rs72662441  | 102574584 | G | A | 0.6428 | 0.5962  | 0.1429 | 4.99E-05 |

**Legend:** ICH: intracerebral hemorrhage; SE: standard error; A1: allele tested; A2: reference

allele; SNP: single nucleotide polymorphism; CHR: chromosome; BP: base pair; FRQ: A1 allele

frequency; OR: odd ratio.

**Supplemental Table 3. Copy number variants overlapping rs11655160.**

| <b>Name</b> | <b>Chr:bp</b>        | <b>Genomic size (bp)</b> | <b>Class</b>                   | <b>Source Study</b> |
|-------------|----------------------|--------------------------|--------------------------------|---------------------|
| nsv996083   | 17:150732-14764202   | 14,613,471               | CNV                            | DGVa:nstd37         |
| nsv2769779  | 17:150733-83084062   | 82,933,330               | CNV                            | DGVa:nstd37         |
| nsv984771   | 17:152427-19335128   | 19,182,702               | CNV                            | DGVa:nstd92         |
| nsv429631   | 17:155903-19147613   | -                        | CNV                            | DGVa:nstd11         |
| nsv429642   | 17:155903-21014469   | -                        | CNV                            | DGVa:nstd11         |
| nsv429545   | 17:155903-21615833   | -                        | CNV                            | DGVa:nstd11         |
| nsv429699   | 17:155903-21620905   | -                        | CNV                            | DGVa:nstd11         |
| nsv984832   | 17:155903-83091923   | -                        | CNV                            | DGVa:nstd11         |
| nsv915790   | 17:162016-12343901   | 12,181,886               | CNV                            | DGVa:nstd37         |
| nsv543103   | 17:203657-20301559   | 20,097,903               | CNV                            | DGVa:nstd54         |
| nsv1062350  | 17:203657-20301559   | 20,097,903               | CNV                            | DGVa:nstd100        |
| nsv1194214  | 17:203657-20301559   | 20,097,903               | CNV                            | DGVa:nstd113        |
| nsv984824   | 17:239173-21558472   | 21,319,300               | CNV                            | DGVa:nstd92         |
| nsv2728619  | 17:302571-17362744   | 17,060,174               | CNV                            | DGVa:nstd130        |
| esv2713257  | 17:557893-29760428   | -                        | inversion                      | DGVa:estd192        |
| esv2711371  | 17:575274-42221597   | -                        | CNV                            | DGVa:estd192        |
| esv2713265  | 17:580529-45752844   | -                        | inversion                      | DGVa:estd192        |
| esv2709933  | 17:594470-42249254   | -                        | CNV                            | DGVa:estd192        |
| esv2711860  | 17:597015-55243588   | -                        | CNV                            | DGVa:estd192        |
| esv2713307  | 17:603388-42204073   | -                        | inversion                      | DGVa:estd192        |
| esv2709266  | 17:621393-45769873   | -                        | inversion                      | DGVa:estd192        |
| esv2711224  | 17:773505-32536264   | -                        | CNV                            | DGVa:estd192        |
| esv2712667  | 17:777106-18794550   | -                        | CNV                            | DGVa:estd192        |
| nsv1141883  | 17:5142272-60211272  | 55,069,001               | inversion                      | DGVa:nstd106        |
| esv2712408  | 17:5195164-55382629  | -                        | inversion                      | DGVa:estd192        |
| nsv497951   | 17:5732953-12095349  | 6,362,397                | CNV                            | DGVa:nstd37         |
| esv2713690  | 17:7218416-18865429  | -                        | inversion                      | DGVa:estd192        |
| esv2712685  | 17:7251561-63607551  | -                        | CNV                            | DGVa:estd192        |
| esv2710813  | 17:7684614-12195546  | -                        | Intrachromosomal<br>breakpoint | DGVa:estd192        |
| nsv1398516  | 17:9701182-11983353  | 2,282,172                | CNV                            | DGVa:nstd102        |
| esv2711942  | 17:9951706-55217447  | -                        | CNV                            | DGVa:estd192        |
| esv2709416  | 17:10014350-55215904 | -                        | inversion                      | DGVa:estd192        |
| esv2711494  | 17:10071809-55226514 | -                        | inversion                      | DGVa:estd192        |
| esv2710806  | 17:10150668-16047382 | -                        | CNV                            | DGVa:estd192        |

|            |                      |            |                               |              |
|------------|----------------------|------------|-------------------------------|--------------|
| nsv2768325 | 17:10444811-11050189 | 605,379    | CNV                           | DGVa:nstd37  |
| nsv2774678 | 17:10676655-11339304 | 662,650    | CNV                           | DGVa:nstd37  |
| nsv533662  | 17:10713492-11312542 | 599,051    | CNV                           | DGVa:nstd37  |
| nsv2768967 | 17:10868631-21607725 | 10,739,095 | CNV                           | DGVa:nstd37  |
| nsv833368  | 17:10892258-11038596 | 146,339    | CNV                           | DGVa:nstd68  |
| nsv531182  | 17:10892259-17964282 | 7,072,024  | CNV                           | DGVa:nstd101 |
| nsv907684  | 17:10911425-11040069 | 128,645    | CNV                           | DGVa:nstd71  |
| esv1048654 | 17:10974889-10974889 | -          | insertion                     | DGVa:estd22  |
| nsv907685  | 17:10978734-11006356 | 27,623     | CNV                           | DGVa:nstd71  |
| nsv1903568 | 17:10980838-10980872 | -          | Short tandem repeat variation | DGVa:nstd128 |
| esv2712289 | 17:10982258-12066139 | -          | Tandem duplication            | DGVa:estd192 |
| esv5356    | 17:10983209-10992458 | -          | sequence_alteration           | DGVa:estd3   |
| esv3639945 | 17:10983237-10992821 | 9,585      | CNV                           | DGVa:estd214 |
| esv3491027 | 17:10983240-10993514 | 10,275     | CNV                           | DGVa:estd59  |
| esv3315137 | 17:10983400-10992517 | 9,118      | CNV                           | DGVa:estd59  |
| esv8358    | 17:10983405-10992662 | 9,258      | CNV                           | DGVa:estd19  |
| esv3494398 | 17:10983435-10992515 | 9,081      | CNV                           | DGVa:estd59  |
| esv3315134 | 17:10983462-10992489 | 9,028      | CNV                           | DGVa:estd59  |
| esv3494399 | 17:10983480-10992465 | 8,986      | CNV                           | DGVa:estd59  |
| esv3494395 | 17:10983485-10992470 | 8,986      | CNV                           | DGVa:estd59  |
| esv3315135 | 17:10983502-10992484 | 8,983      | CNV                           | DGVa:estd59  |
| esv3969    | 17:10983511-10992491 | 8,981      | CNV                           | DGVa:estd3   |
| esv3315136 | 17:10983523-10992420 | 8,898      | CNV                           | DGVa:estd59  |
| esv3494400 | 17:10983534-10992421 | 8,888      | CNV                           | DGVa:estd59  |
| esv2715643 | 17:10983536-10992469 | 8,934      | CNV                           | DGVa:estd201 |
| esv2661564 | 17:10983537-10992414 | 8,878      | CNV                           | DGVa:estd199 |
| esv3494401 | 17:10983538-10992419 | 8,882      | CNV                           | DGVa:estd59  |
| esv3315138 | 17:10983538-10992419 | 8,882      | CNV                           | DGVa:estd59  |
| nsv112575  | 17:10983542-10992418 | 8,877      | CNV                           | DGVa:nstd6   |
| esv3355264 | 17:10983665-10992531 | 8,867      | CNV                           | DGVa:estd59  |
| nsv1903569 | 17:10984577-10984608 | -          | Short tandem repeat variation | DGVa:nstd128 |
| esv3409310 | 17:10984765-10984830 | -          | insertion                     | DGVa:estd59  |
| esv3304052 | 17:10984780-10984815 | -          | Mobile element insertion      | DGVa:estd59  |
| esv3357129 | 17:10984781-10984815 | -          | insertion                     | DGVa:estd59  |
| nsv2796772 | 17:10984798-10984798 | -          | insertion                     | DGVa:nstd137 |
| esv1232722 | 17:10984812-10984812 | -          | insertion                     | DGVa:estd22  |
| esv3639946 | 17:10984812-10984812 | -          | Mobile element insertion      | DGVa:estd214 |
| nsv992450  | 17:10984812-10984813 | -          | Mobile element insertion      | DGVa:nstd94  |

|            |                      |         |                                  |              |
|------------|----------------------|---------|----------------------------------|--------------|
| nsv574352  | 17:10984945-10996377 | 11,433  | CNV                              | DGVa:nstd54  |
| nsv457668  | 17:10984945-10996377 | 11,433  | CNV                              | DGVa:nstd27  |
| esv3315484 | 17:10985110-10989708 | 4,599   | CNV                              | DGVa:estd59  |
| esv3315486 | 17:10985110-10989708 | 4,599   | CNV                              | DGVa:estd59  |
| esv1843146 | 17:10985198-11123385 | 138,188 | CNV                              | DGVa:estd188 |
| esv1842854 | 17:10985604-10995904 | 10,301  | CNV                              | DGVa:estd188 |
| esv1845891 | 17:10985805-10992328 | 6,524   | CNV                              | DGVa:estd188 |
| esv3491026 | 17:10985960-10993158 | 7,199   | CNV                              | DGVa:estd59  |
| esv3491028 | 17:10985960-10993158 | 7,199   | CNV                              | DGVa:estd59  |
| esv1842842 | 17:10986005-10992763 | 6,759   | CNV                              | DGVa:estd188 |
| esv1850942 | 17:10986005-11016465 | 30,461  | CNV                              | DGVa:estd188 |
| nsv1184680 | 17:10986064-10992639 | 6,576   | CNV                              | DGVa:nstd112 |
| nsv517386  | 17:10986304-10992362 | 6,059   | CNV                              | DGVa:nstd21  |
| esv1846162 | 17:10986304-10992362 | 6,059   | CNV                              | DGVa:estd188 |
| esv1851627 | 17:10986304-10992400 | 6,097   | CNV                              | DGVa:estd188 |
| esv1851210 | 17:10986304-10992400 | 6,097   | CNV                              | DGVa:estd188 |
| esv1842997 | 17:10986304-10992400 | 6,097   | CNV                              | DGVa:estd188 |
| esv1844777 | 17:10986304-10992400 | 6,097   | CNV                              | DGVa:estd188 |
| esv1849877 | 17:10986304-10992719 | 6,416   | CNV                              | DGVa:estd188 |
| esv1848326 | 17:10986304-10992719 | 6,416   | CNV                              | DGVa:estd188 |
| nsv1387113 | 17:10986360-10991125 | 4,766   | CNV                              | DGVa:nstd122 |
| nsv574353  | 17:10986360-10992362 | 6,003   | CNV                              | DGVa:nstd54  |
| esv3510638 | 17:10986360-10993458 | 7,099   | CNV                              | DGVa:estd59  |
| esv3510639 | 17:10986360-10993458 | 7,099   | CNV                              | DGVa:estd59  |
| esv2662169 | 17:10986928-10992475 | 5,548   | CNV                              | DGVa:estd199 |
| esv17501   | 17:10987030-10992365 | 5,336   | CNV                              | DGVa:estd20  |
| esv25950   | 17:10987030-10992365 | -       | sequence_alteration              | DGVa:estd20  |
| nsv827885  | 17:10987139-10992391 | 5,253   | CNV                              | DGVa:nstd67  |
| nsv820178  | 17:10987150-10992577 | 5,428   | CNV                              | DGVa:nstd43  |
| esv1850222 | 17:10987170-10992328 | 5,159   | CNV                              | DGVa:estd188 |
| esv1849925 | 17:10987370-10992763 | 5,394   | CNV                              | DGVa:estd188 |
| nsv1901024 | 17:10987805-10987832 | -       | Short tandem repeat<br>variation | DGVa:nstd128 |
| esv3315487 | 17:10987910-10993708 | 5,799   | CNV                              | DGVa:estd59  |
| esv3315488 | 17:10987910-10993708 | 5,799   | CNV                              | DGVa:estd59  |
| esv1846359 | 17:10988052-10992400 | 4,349   | CNV                              | DGVa:estd188 |
| esv1848534 | 17:10988052-10992400 | 4,349   | CNV                              | DGVa:estd188 |
| esv1844288 | 17:10988052-10992400 | 4,349   | CNV                              | DGVa:estd188 |
| esv1844634 | 17:10988052-10992400 | 4,349   | CNV                              | DGVa:estd188 |



|            |                      |        |                               |              |
|------------|----------------------|--------|-------------------------------|--------------|
| esv1845230 | 17:10988052-10992400 | 4,349  | CNV                           | DGVa:estd188 |
| esv1845253 | 17:10988052-10992400 | 4,349  | CNV                           | DGVa:estd188 |
| esv1845637 | 17:10988052-10992400 | 4,349  | CNV                           | DGVa:estd188 |
| nsv574354  | 17:10988160-10991390 | 3,231  | CNV                           | DGVa:nstd54  |
| nsv1380962 | 17:10988160-10991390 | 3,231  | CNV                           | DGVa:nstd122 |
| nsv1381533 | 17:10988160-10992135 | 3,976  | CNV                           | DGVa:nstd122 |
| nsv574355  | 17:10988160-10992362 | 4,203  | CNV                           | DGVa:nstd54  |
| esv1846309 | 17:10988160-10992362 | 4,203  | CNV                           | DGVa:estd188 |
| esv1847124 | 17:10988160-10992362 | 4,203  | CNV                           | DGVa:estd188 |
| esv1847800 | 17:10988160-10992362 | 4,203  | CNV                           | DGVa:estd188 |
| esv1848056 | 17:10988160-10992362 | 4,203  | CNV                           | DGVa:estd188 |
| esv1848718 | 17:10988160-10992362 | 4,203  | CNV                           | DGVa:estd188 |
| esv1850182 | 17:10988160-10992362 | 4,203  | CNV                           | DGVa:estd188 |
| nsv1385199 | 17:10988160-10992362 | 4,203  | CNV                           | DGVa:nstd122 |
| esv1850465 | 17:10988160-10992719 | 4,560  | CNV                           | DGVa:estd188 |
| esv1842778 | 17:10988160-10992719 | 4,560  | CNV                           | DGVa:estd188 |
| esv1844254 | 17:10988160-10992719 | 4,560  | CNV                           | DGVa:estd188 |
| esv1849882 | 17:10988160-10992719 | 4,560  | CNV                           | DGVa:estd188 |
| nsv1390024 | 17:10988160-10992719 | 4,560  | CNV                           | DGVa:nstd122 |
| nsv574356  | 17:10988516-10991125 | 2,610  | CNV                           | DGVa:nstd54  |
| nsv1387098 | 17:10988516-10991720 | 3,205  | CNV                           | DGVa:nstd122 |
| nsv574357  | 17:10988754-10991720 | 2,967  | CNV                           | DGVa:nstd54  |
| nsv574358  | 17:10988754-10992135 | 3,382  | CNV                           | DGVa:nstd54  |
| nsv1385474 | 17:10988754-10992362 | 3,609  | CNV                           | DGVa:nstd122 |
| esv1224726 | 17:10989250-10989250 | -      | insertion                     | DGVa:estd22  |
| nsv1902174 | 17:10989408-10989425 | -      | Short tandem repeat variation | DGVa:nstd128 |
| esv1442274 | 17:10990423-10990423 | -      | insertion                     | DGVa:estd22  |
| esv3204656 | 17:10990423-10990424 | 2      | CNV                           | DGVa:estd209 |
| esv1368591 | 17:10990432-10990433 | 2      | CNV                           | DGVa:estd22  |
| esv1616703 | 17:10991521-10991521 | -      | insertion                     | DGVa:estd22  |
| nsv1110918 | 17:10991583-10991734 | 152    | inversion                     | DGVa:nstd106 |
| esv1485040 | 17:10991711-10991711 | -      | insertion                     | DGVa:estd22  |
| nsv907686  | 17:10992362-11006356 | 13,995 | CNV                           | DGVa:nstd71  |
| esv2439214 | 17:10993424-10993424 | -      | insertion                     | DGVa:estd197 |
| esv2147234 | 17:10993425-10993425 | -      | insertion                     | DGVa:estd194 |
| nsv1901025 | 17:10994865-10994899 | -      | Short tandem repeat variation | DGVa:nstd128 |
| esv1411301 | 17:10995712-10995715 | 4      | CNV                           | DGVa:estd22  |
| esv3554130 | 17:10995712-10995739 | 28     | CNV                           | DGVa:estd215 |

|            |                      |        |                               |              |
|------------|----------------------|--------|-------------------------------|--------------|
| esv1036426 | 17:10995772-10995775 | 4      | CNV                           | DGVa:estd22  |
| nsv108685  | 17:10996138-10996146 | 9      | CNV                           | DGVa:nstd6   |
| nsv1901026 | 17:10998214-10998227 | -      | Short tandem repeat variation | DGVa:nstd128 |
| esv3582526 | 17:10998372-11021531 | 23,160 | CNV                           | DGVa:estd212 |
| esv3204658 | 17:10999476-10999477 | 2      | CNV                           | DGVa:estd209 |
| esv1313853 | 17:10999479-10999480 | 2      | CNV                           | DGVa:estd22  |
| nsv1903570 | 17:10999978-11000032 | -      | Short tandem repeat variation | DGVa:nstd128 |
| esv1036756 | 17:10999988-10999990 | 3      | CNV                           | DGVa:estd22  |
| nsv1902175 | 17:11003799-11003809 | -      | Short tandem repeat variation | DGVa:nstd128 |
